# Supplementary material for: Helicity discrimination in N,N′-dibenzoyl-1,2,3,4,7,8,9,10-octahydro-1,10-phenanthrolines and their thiono- and selenocarbonyl analogues by inclusion complexation with chiral diols
Source: Royal Society of Chemistry journal article supplement (doi:10.1039/c3ob41216d), 2013-01-01
Supplement: c3ob41216d.pdf [file c3ob41216d.pdf]

## Helicity discrimination in *N,N'*-dibenzoyl-1,2,3,4,7,8,9,10-octahydro-1,10-phenanthrolines and their thiono- and selenocarbonyl analogues by inclusion complexation with chiral diols

### Supporting information

Teresa Olszewska,<sup>a\*</sup> Artur Sikorski,<sup>b</sup> Aleksander Herman,<sup>a</sup> and Tadeusz Połowski<sup>a</sup>

<sup>a</sup>Department of Chemistry, Technical University, 80-233 Gdańsk, Poland

<sup>b</sup>Faculty of Chemistry, University of Gdańsk, 80-952 Gdańsk, Poland

\* Corresponding author. Tel.; +48 58 3471425; fax: +48 58 3472694.

E-mail address: [terolsze@pg.gda.pl](mailto:terolsze@pg.gda.pl) (T. Olszewska).

### Table of Contents

|                                                                                                                                            |    |
|--------------------------------------------------------------------------------------------------------------------------------------------|----|
| 1) 1,2,3,4,7,8,9,10-octahydro-1,10-phenanthroline ( <b>4</b> ) – <sup>1</sup> H NMR.....                                                   | 1  |
| 2) 1,2,3,4,7,8,9,10-octahydro-1,10-phenanthroline ( <b>4</b> ) – <sup>13</sup> C NMR.....                                                  | 2  |
| 3) <i>N,N'</i> -dibenzoyl-1,2,3,4,7,8,9,10-octahydro-1,10-phenanthroline ( <b>5a</b> ) – <sup>1</sup> H NMR.....                           | 3  |
| 4) <i>N,N'</i> -dibenzoyl-1,2,3,4,7,8,9,10-octahydro-1,10-phenanthroline ( <b>5a</b> ) – <sup>13</sup> C NMR.....                          | 4  |
| 5) <i>N,N'</i> -dithionobenzoyl-1,2,3,4,7,8,9,10-octahydro-1,10-phenanthroline ( <b>5b</b> ) – <sup>1</sup> H NMR.....                     | 5  |
| 6) <i>N,N'</i> -dithionobenzoyl-1,2,3,4,7,8,9,10-octahydro-1,10-phenanthroline ( <b>5b</b> ) – <sup>13</sup> C NMR.....                    | 6  |
| 7) <i>N,N'</i> -diselenobenzoyl-1,2,3,4,7,8,9,10-octahydro-1,10-phenanthroline ( <b>5c</b> ) – <sup>1</sup> H NMR.....                     | 7  |
| 8) <i>N,N'</i> -diselenobenzoyl-1,2,3,4,7,8,9,10-octahydro-1,10-phenanthroline ( <b>5c</b> ) – <sup>13</sup> C NMR.....                    | 8  |
| 9) <i>N,N'</i> -diselenobenzoyl-1,2,3,4,7,8,9,10-octahydro-1,10-phenanthroline ( <b>5c</b> ) – <sup>77</sup> Se NMR.....                   | 9  |
| 10) <i>N</i> -benzoyl- <i>N'</i> -selenidobenzoyl-1,2,3,4,7,8,9,10-octahydro-1,10-phenanthroline ( <b>5d</b> ) – <sup>1</sup> H NMR.....   | 10 |
| 11) <i>N</i> -benzoyl- <i>N'</i> -selenidobenzoyl-1,2,3,4,7,8,9,10-octahydro-1,10-phenanthroline ( <b>5d</b> ) – <sup>1</sup> H NMR.....   | 11 |
| 12) <i>N</i> -benzoyl- <i>N'</i> -selenidobenzoyl-1,2,3,4,7,8,9,10-octahydro-1,10-phenanthroline ( <b>5d</b> ) – <sup>77</sup> Se NMR..... | 12 |
| 13) <i>N,N'</i> -Terephthaloyl-bis(1-benzoyl-1,2,3,4,7,8,9,10-octahydro-[1,10]phenanthroline) ( <b>7</b> ) – <sup>1</sup> H NMR.....       | 13 |
| 14) <b>Fig. 1S</b> Molecular structures of the compounds ( <b>5a-5d</b> ).....                                                             | 14 |
| 15) <b>Fig. 2S</b> Crystal packing of compounds ( <b>5a-5d</b> ).....                                                                      | 15 |
| 16) <b>Fig. 3S</b> Molecular structure and crystal packing of the complex ( <b>5c·6a</b> ).....                                            | 16 |
| 17) <b>Fig. 6S</b> Molecular structure of the bisamide ( <b>7</b> ).....                                                                   | 17 |
| 18) <b>Table 1</b> DFT TZ2P LDA ZORA calculated structures and energies - compounds ( <b>5a-5c</b> ).....                                  | 18 |

1,2,3,4,7,8,9,10-octahydro-1,10-phenanthroline (**4**) –  $^1\text{H}$  NMR

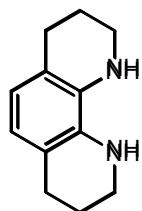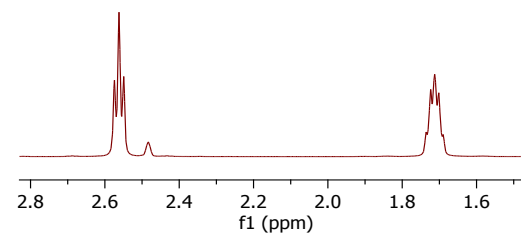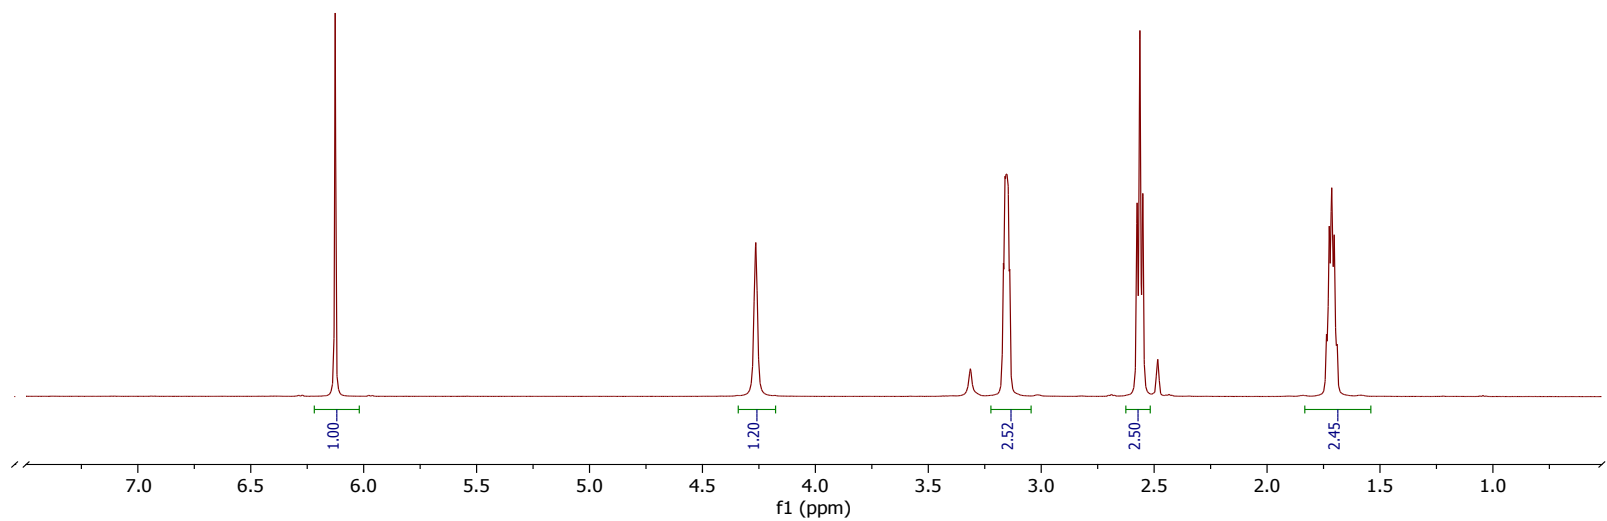

1,2,3,4,7,8,9,10-octahydro-1,10-phenanthroline (**4**) –  $^{13}\text{C}$  NMR

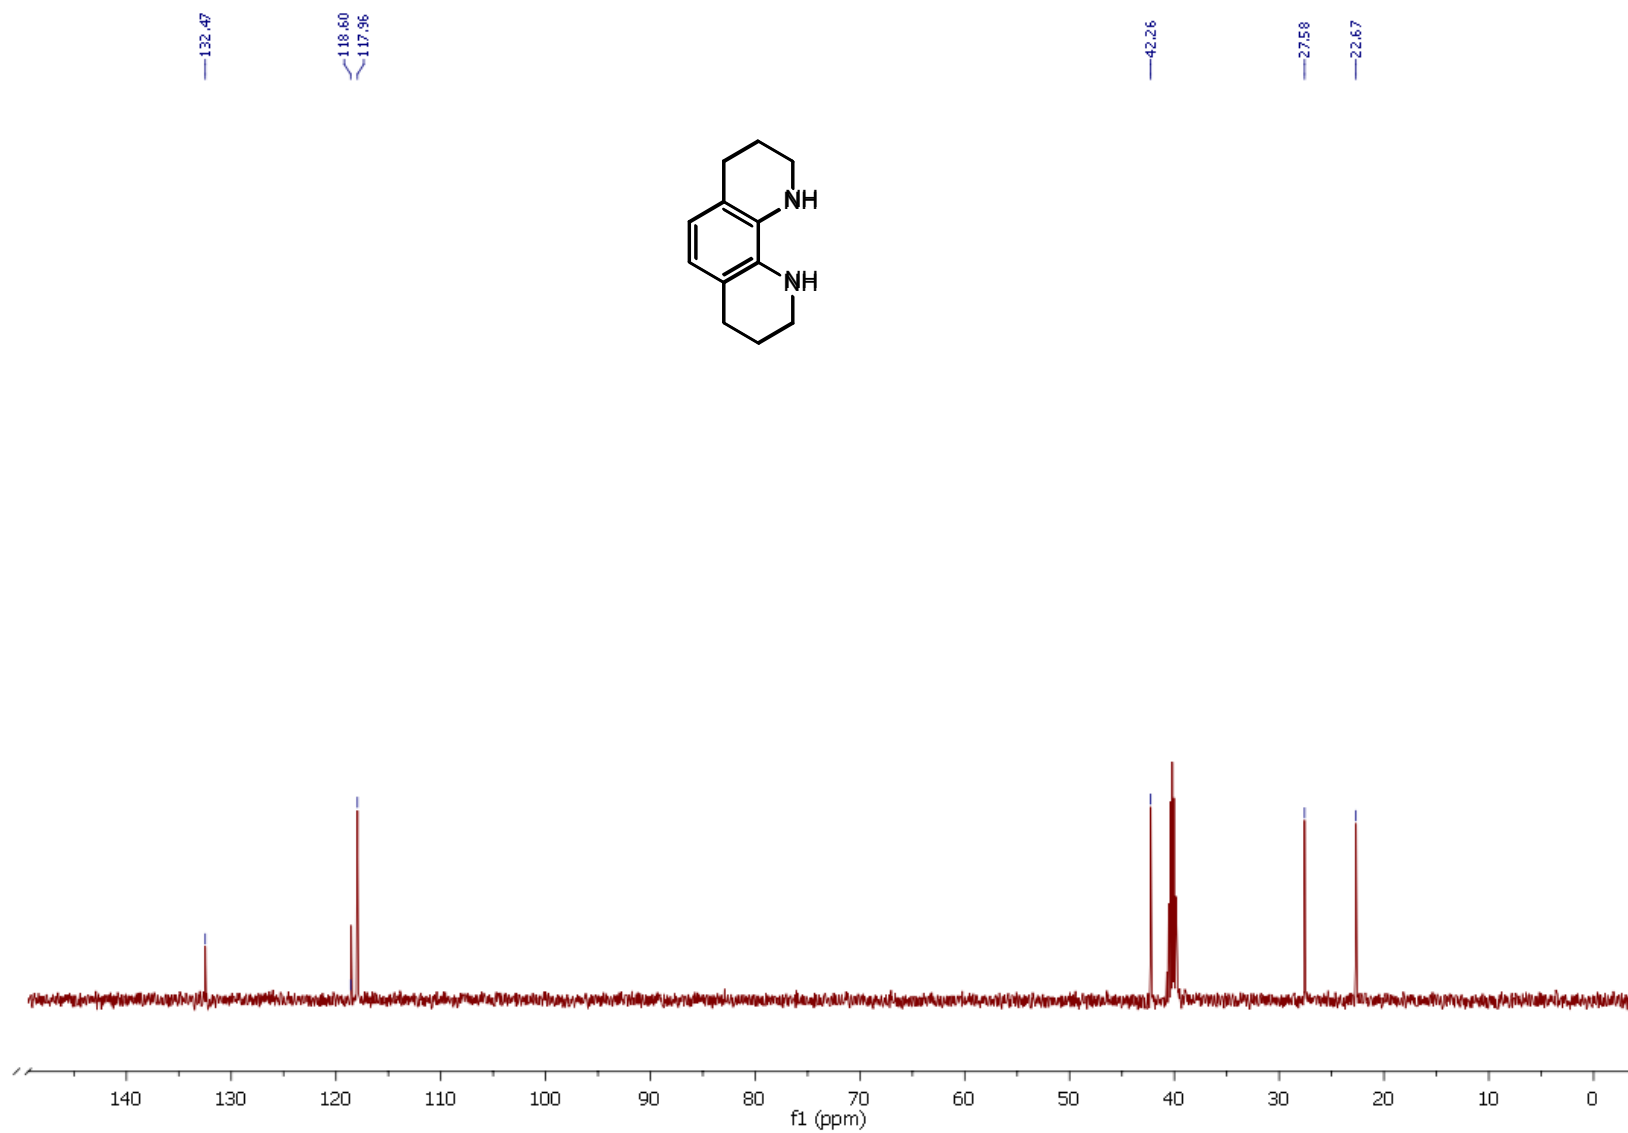

*N,N'*-dibenzoyl-1,2,3,4,7,8,9,10-octahydro-1,10-phenanthroline (**5a**) – <sup>1</sup>H NMR

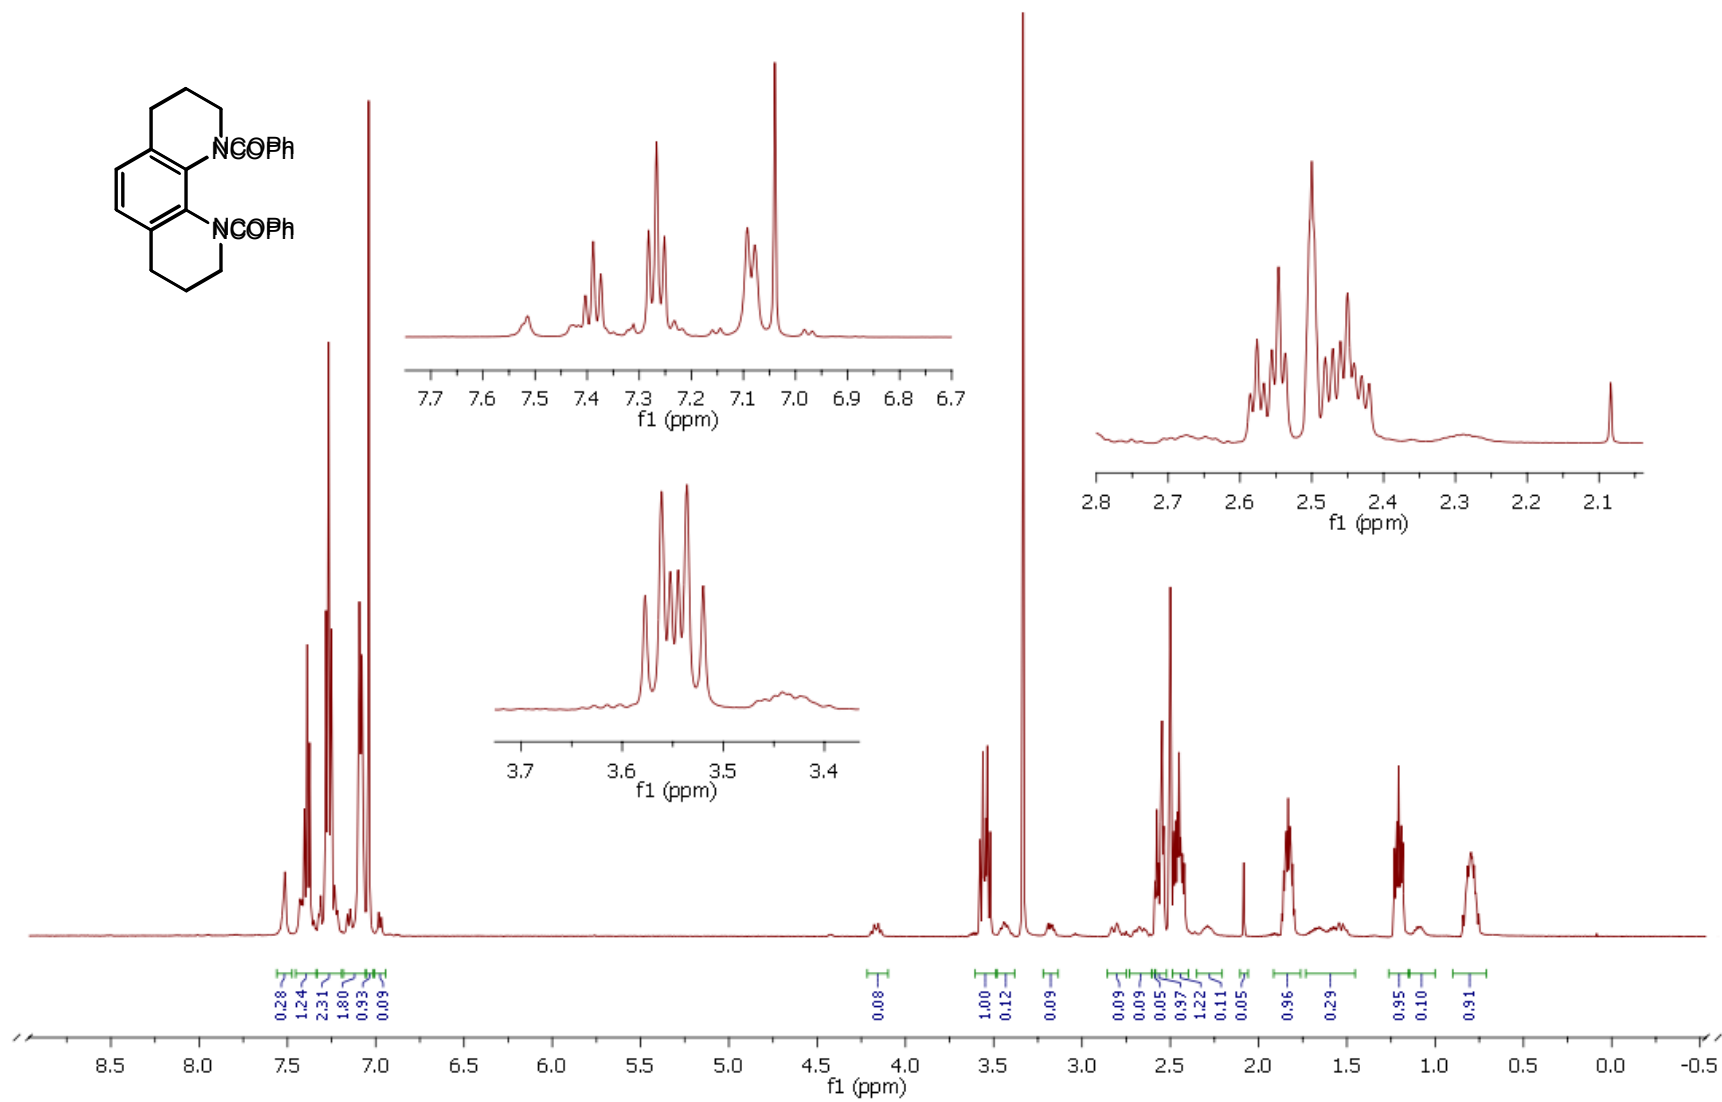



*N,N'*-dibenzoyl-1,2,3,4,7,8,9,10-octahydro-1,10-phenanthroline (**5a**) –  $^{13}\text{C}$  NMR

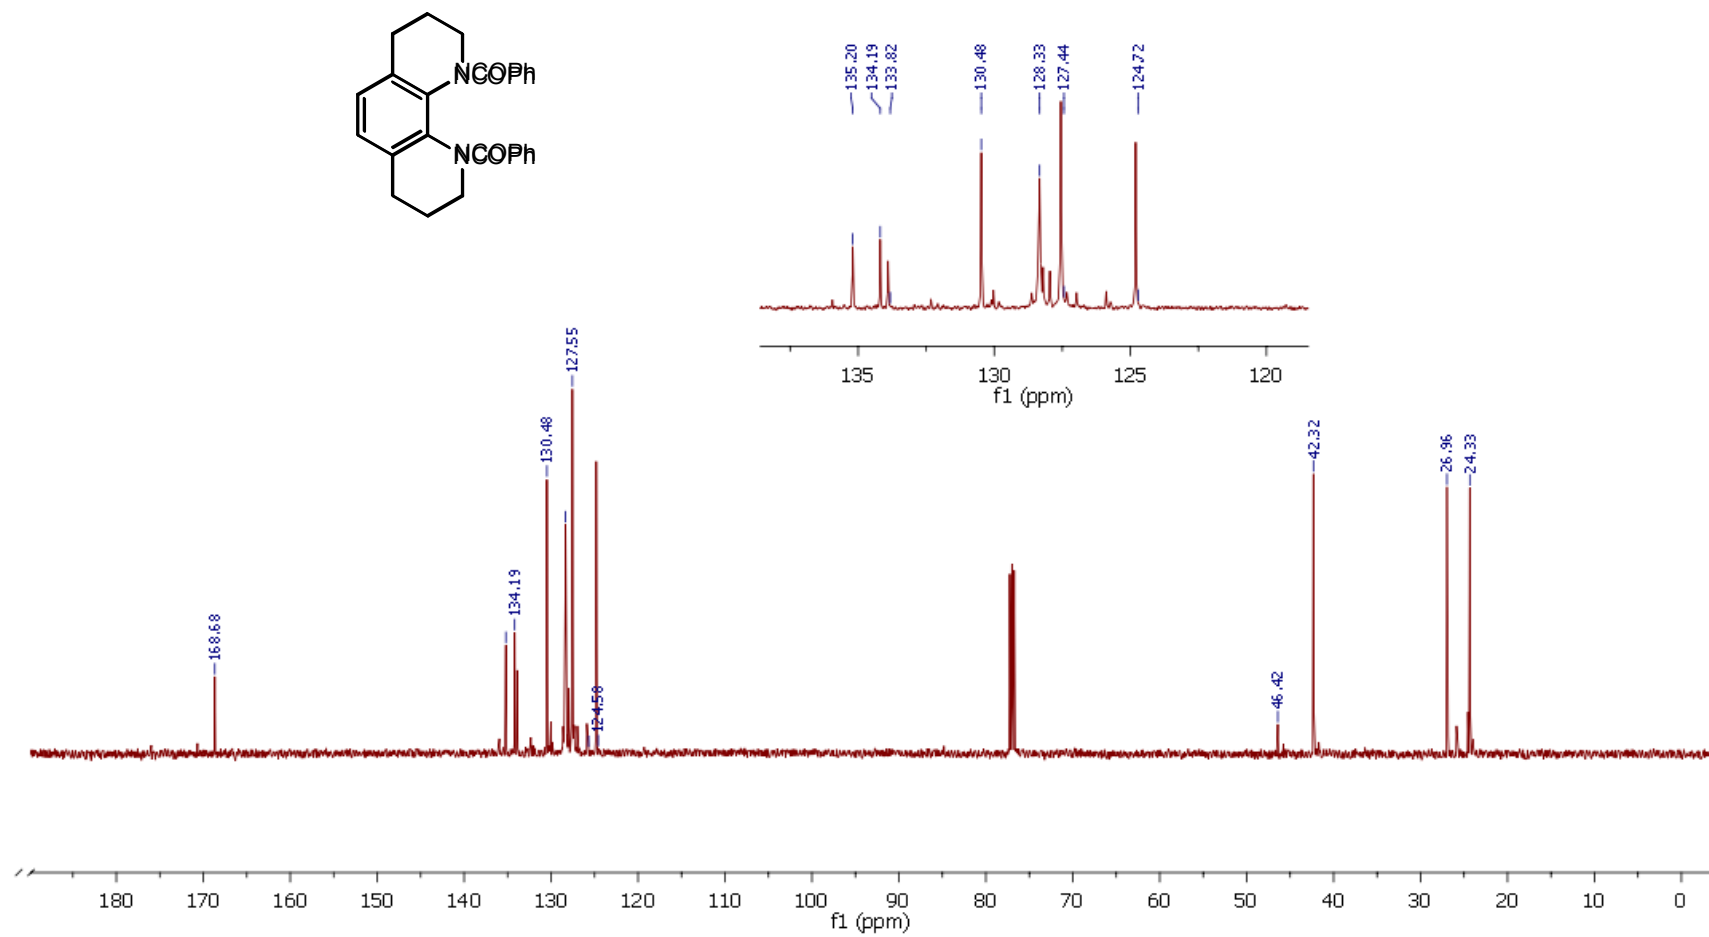

*N,N'*-dithionobenzoyl-1,2,3,4,7,8,9,10-octahydro-1,10-phenanthroline (**5b**) – <sup>1</sup>H NMR

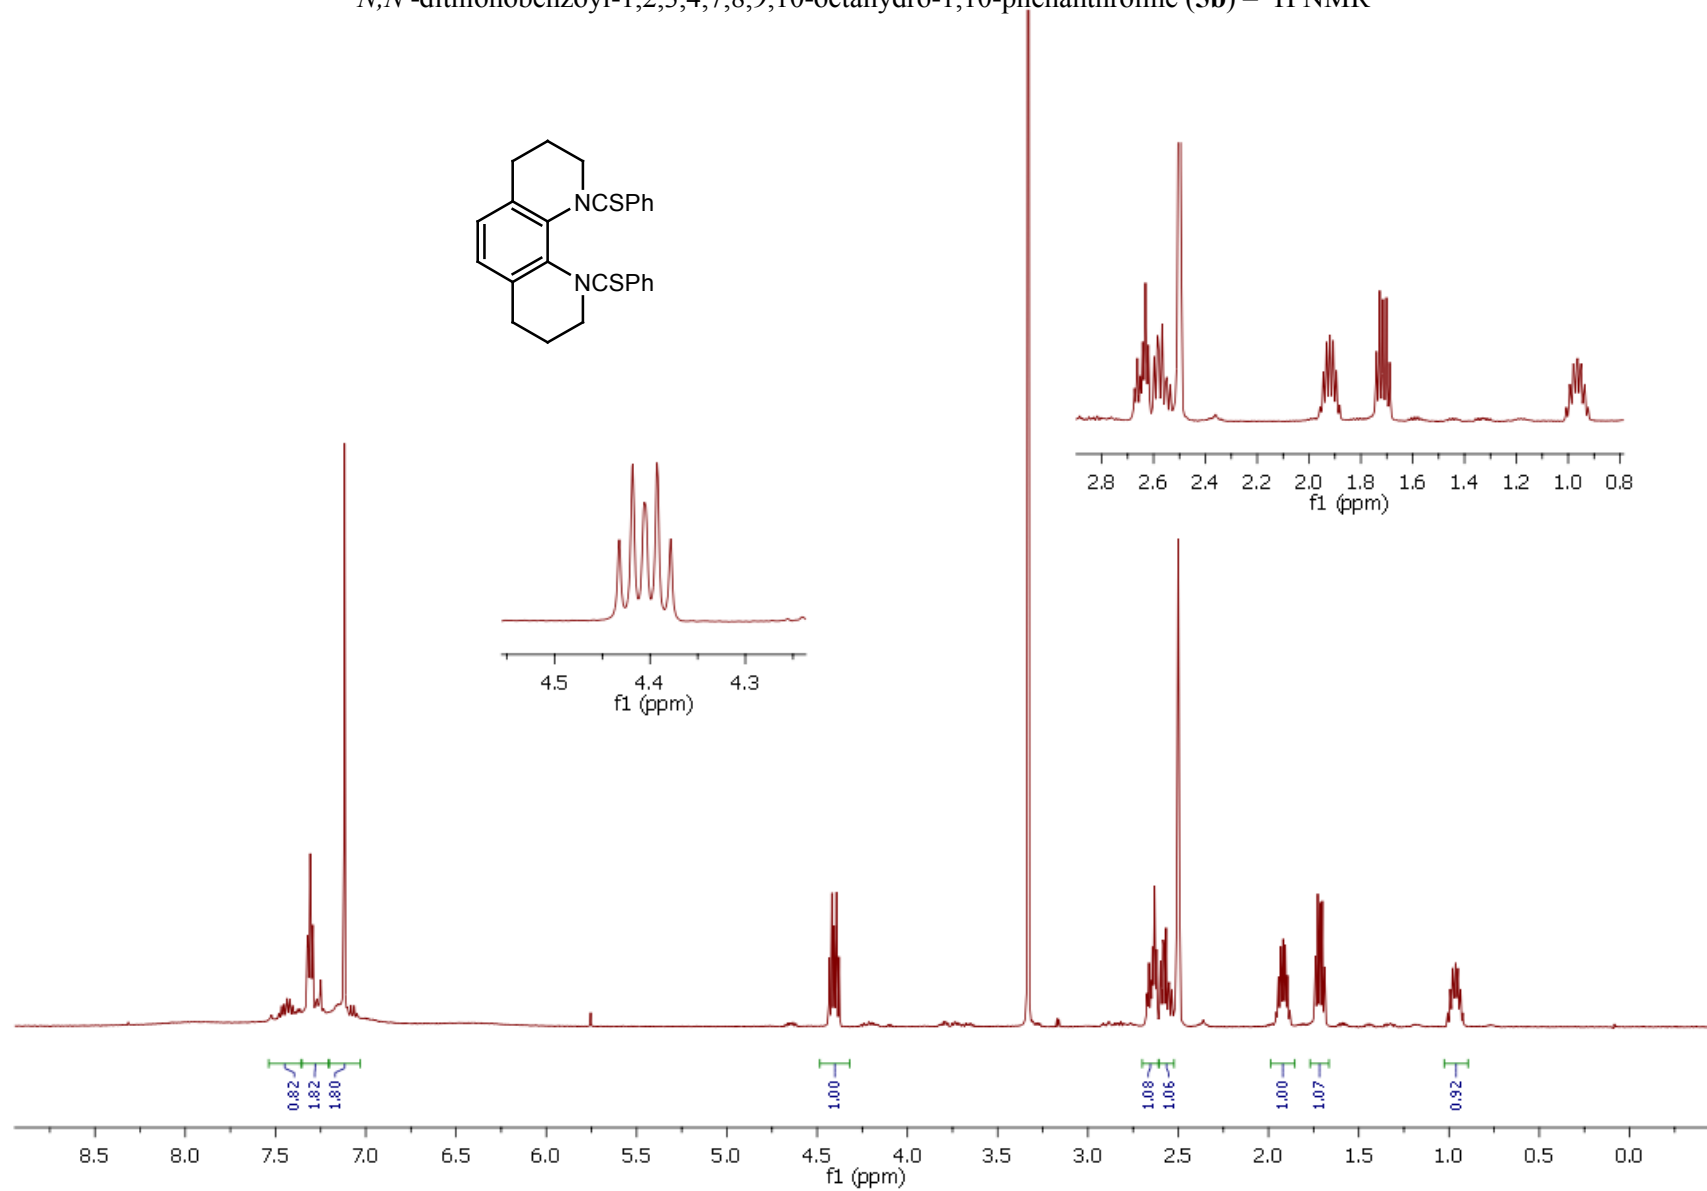

*N,N'*-dithionobenzoyl-1,2,3,4,7,8,9,10-octahydro-1,10-phenanthroline (**5b**) –  $^{13}\text{C}$  NMR

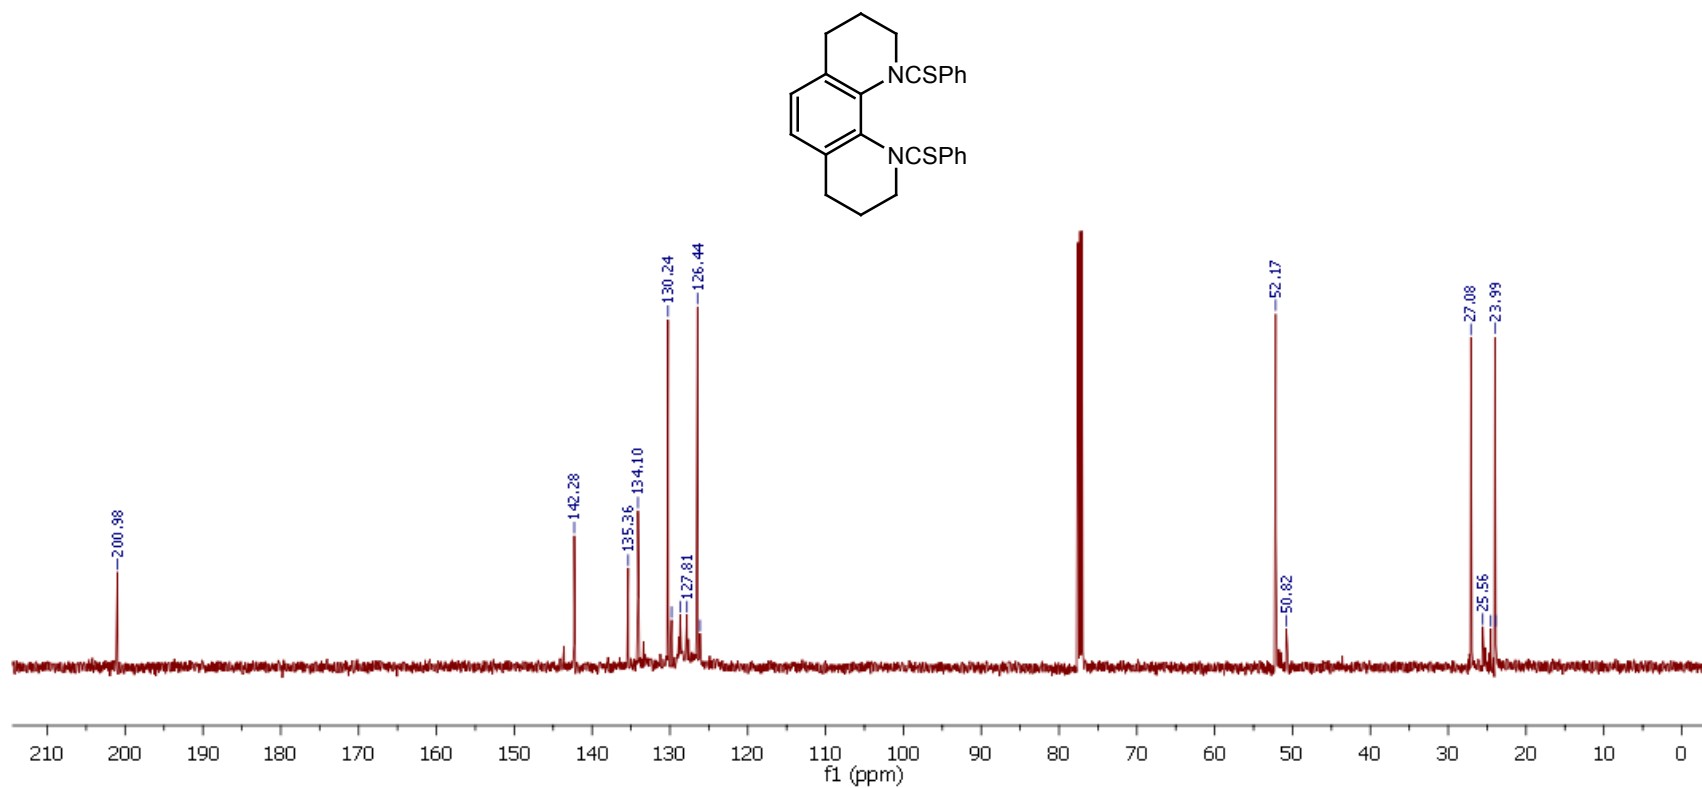

*N,N'*-diselenobenzoyl-1,2,3,4,7,8,9,10-octahydro-1,10-phenanthroline (**5c**) – <sup>1</sup>H NMR

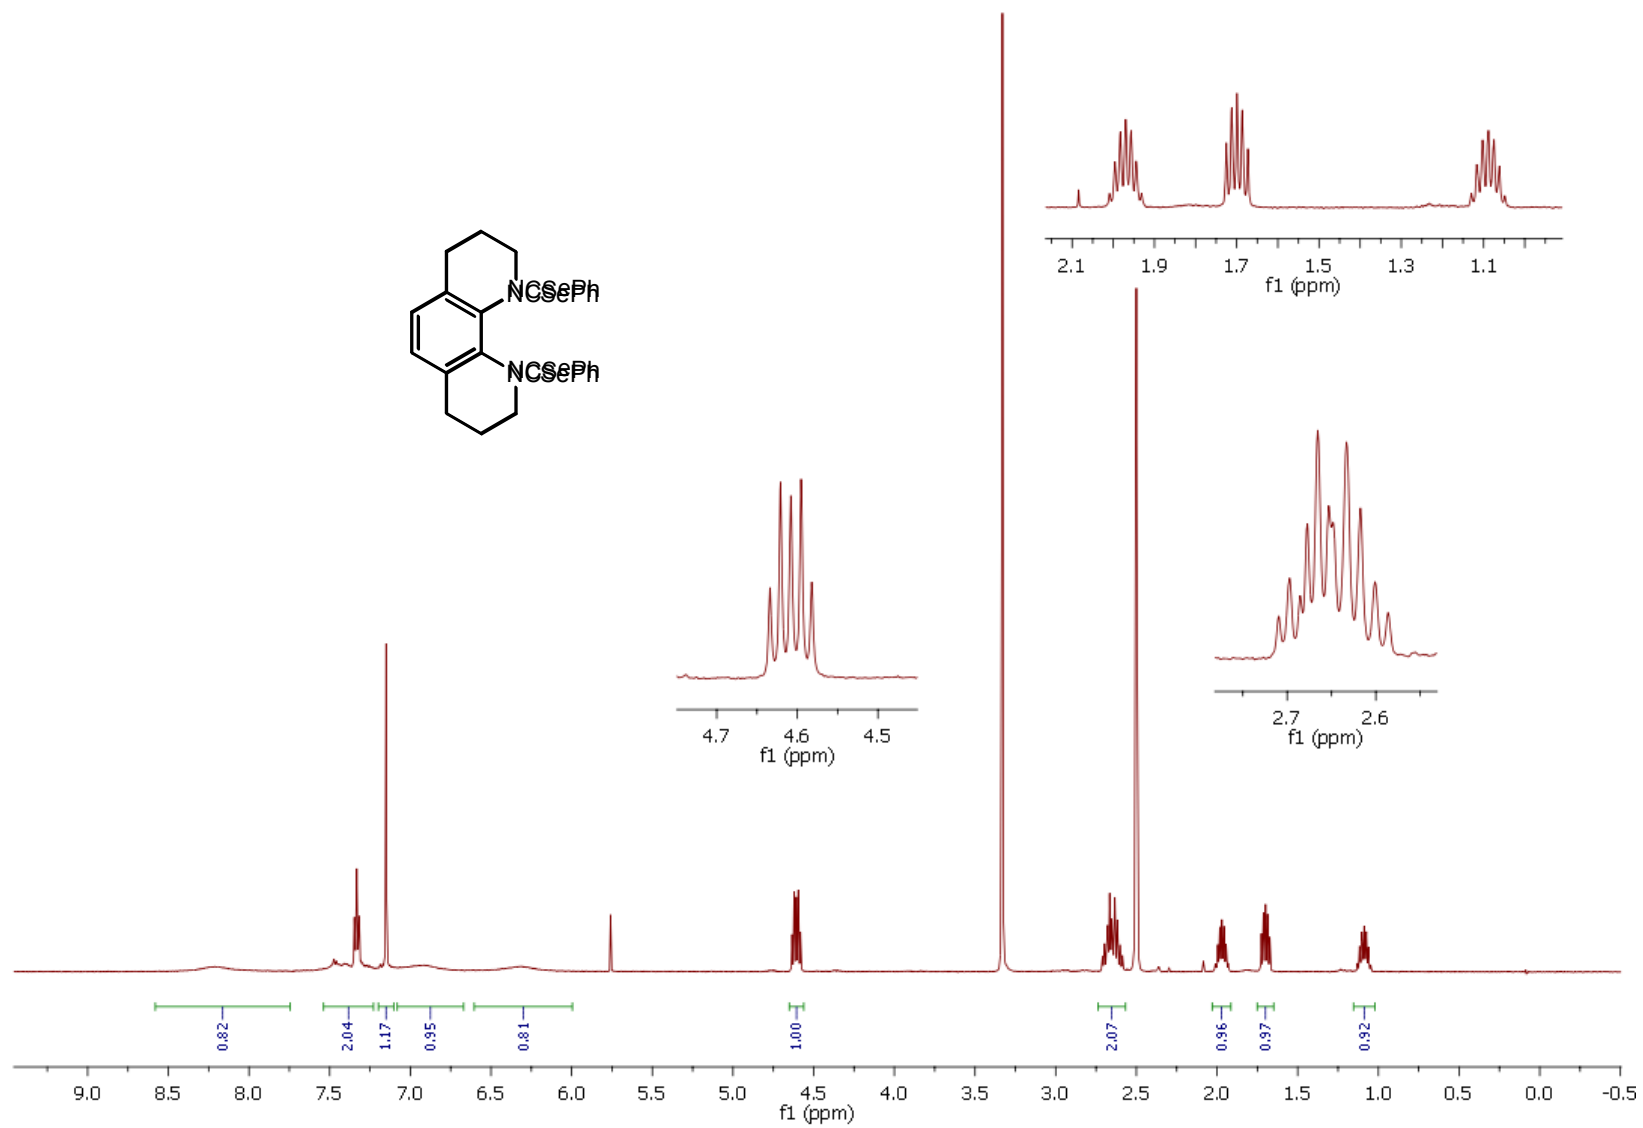

*N,N'*-diselenobenzoyl-1,2,3,4,7,8,9,10-octahydro-1,10-phenanthroline (**5c**) –  $^{13}\text{C}$  NMR

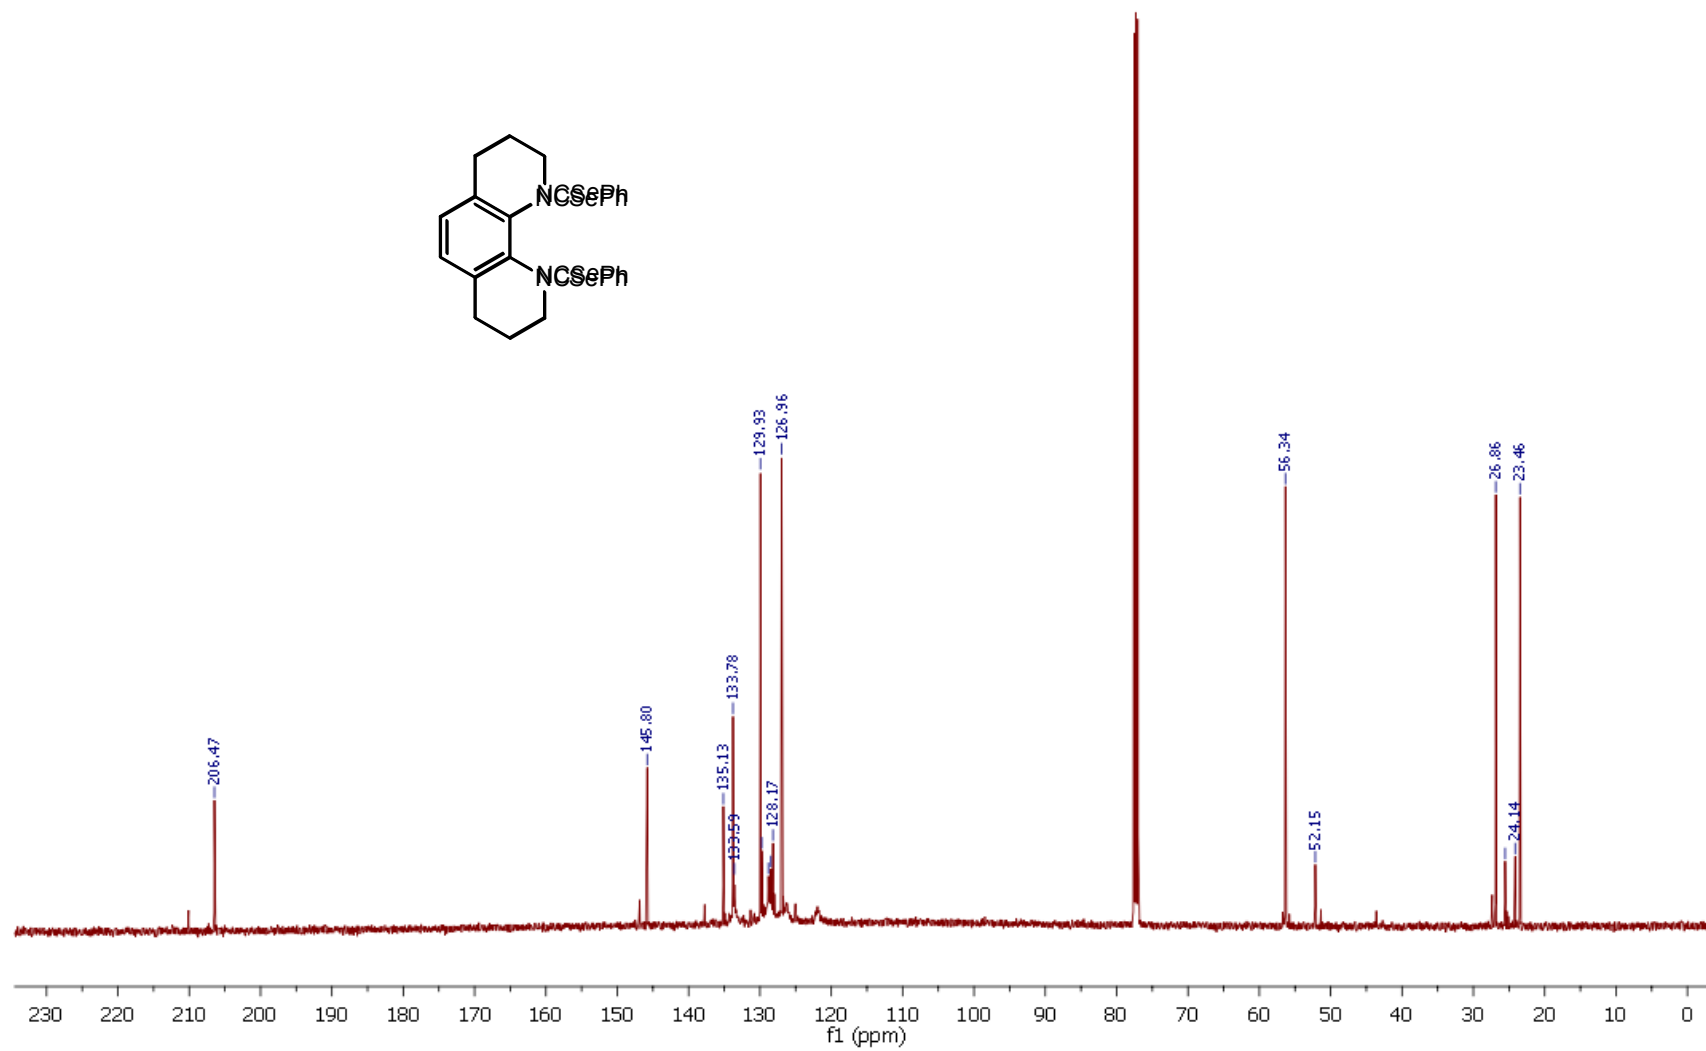

*N,N'*-diselenobenzoyl-1,2,3,4,7,8,9,10-octahydro-1,10-phenanthroline (**5c**) –  $^{77}\text{Se}$  NMR

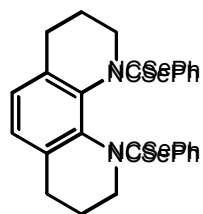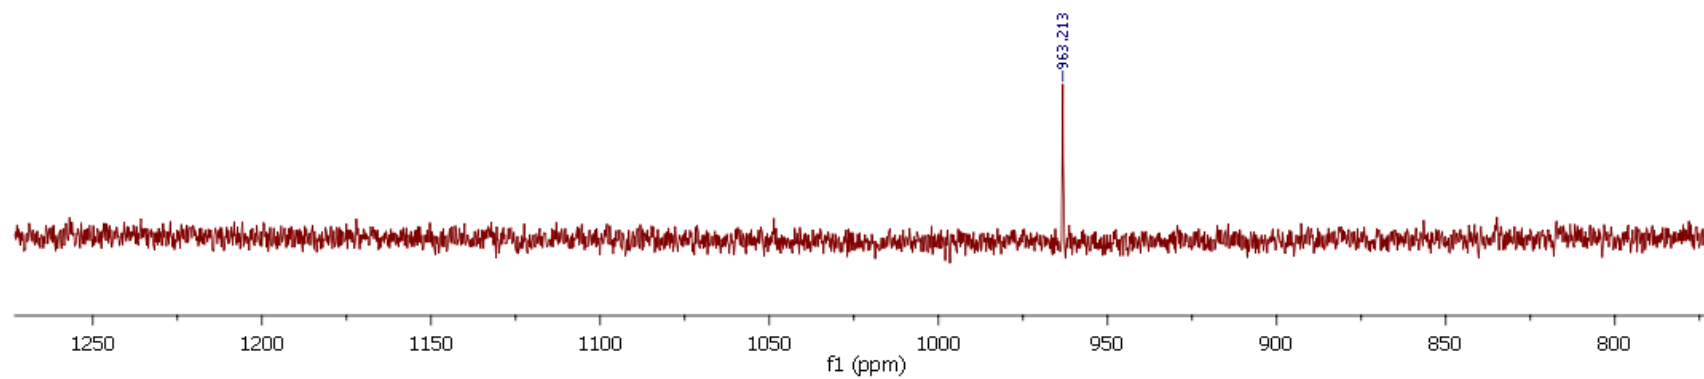

*N*-benzoyl-*N'*-selenidobezoyl-1,2,3,4,7,8,9,10-octahydro-1,10-phenanthroline (**5d**) – <sup>1</sup>H NMR

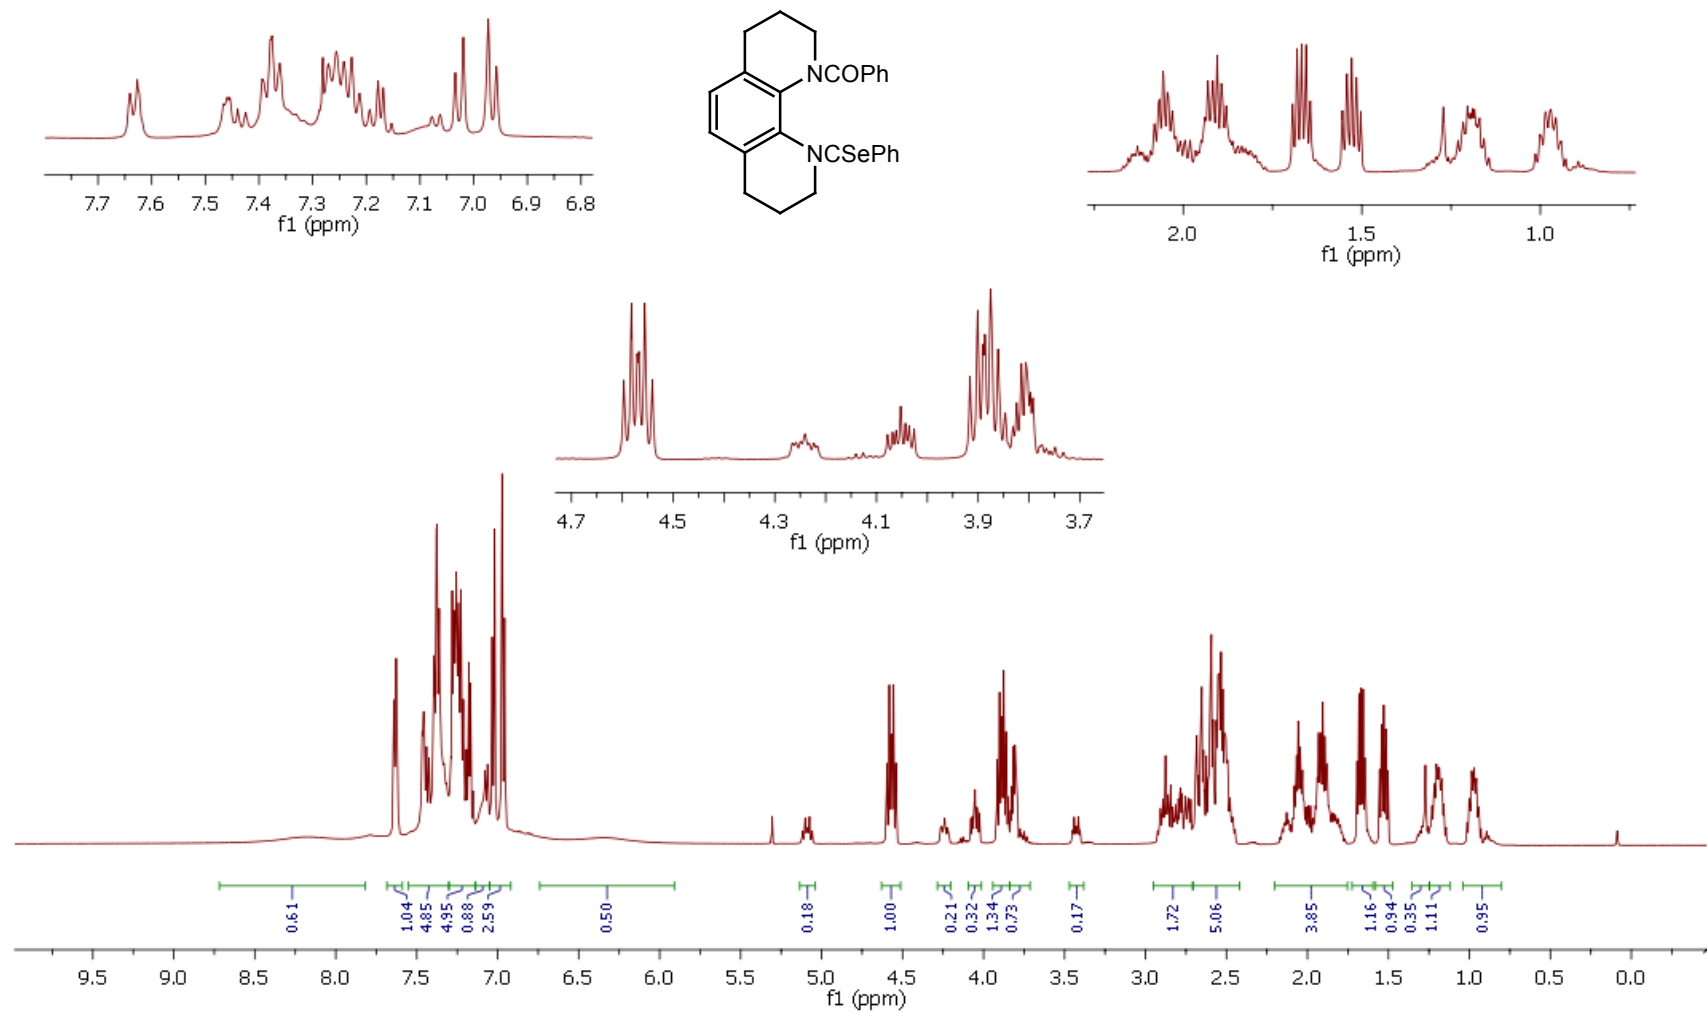

*N*-benzoyl-*N'*-selenidobezoyl-1,2,3,4,7,8,9,10-octahydro-1,10-phenanthroline (**5d**) – <sup>13</sup>C NMR

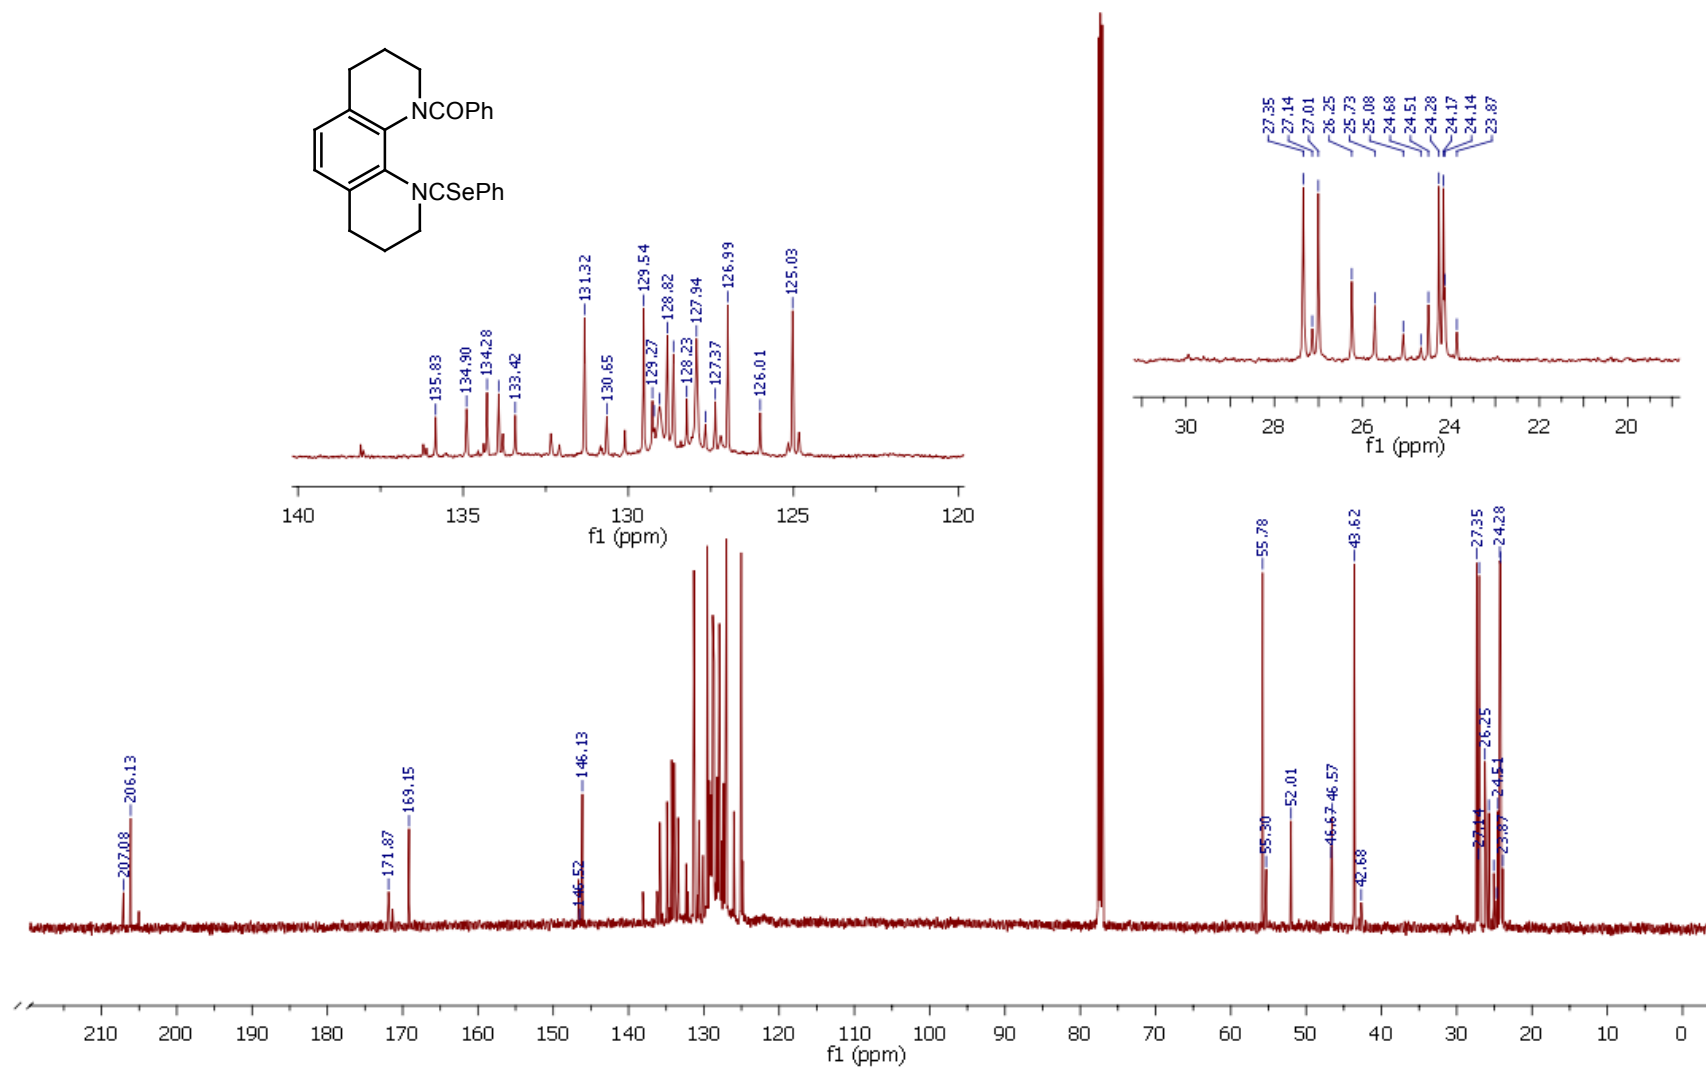



*N*-benzoyl-*N'*-selenidobezoyl-1,2,3,4,7,8,9,10-octahydro-1,10-phenanthroline (**5d**) –  $^{77}\text{Se}$  NMR

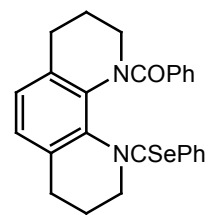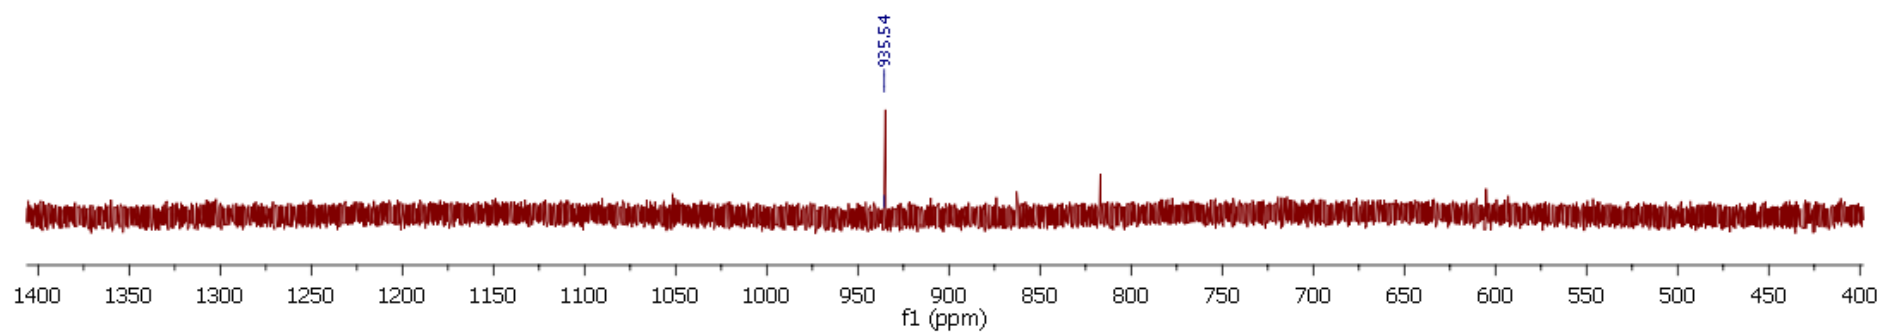

*N,N'*-Terephthaloyl-bis(1-benzoyl-1,2,3,4,7,8,9,10-octahydro-[1,10]phenanthroline) (**7**) – <sup>1</sup>H NMR

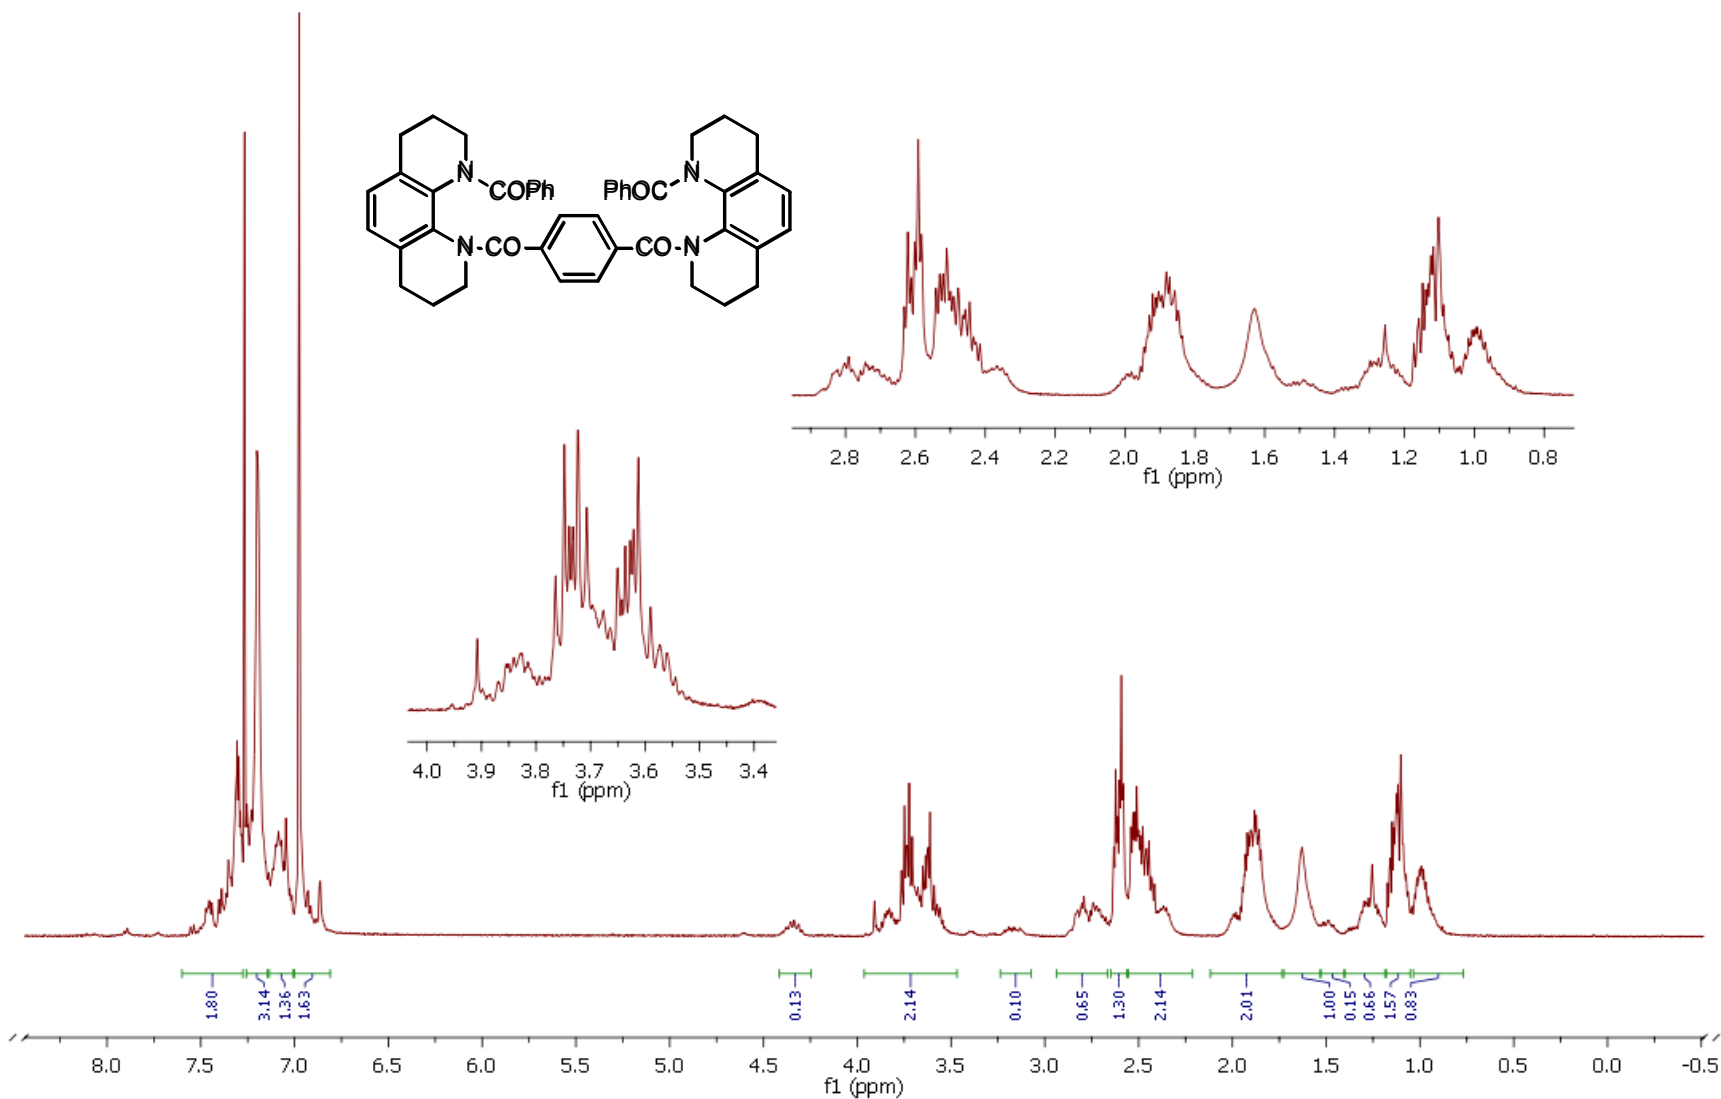

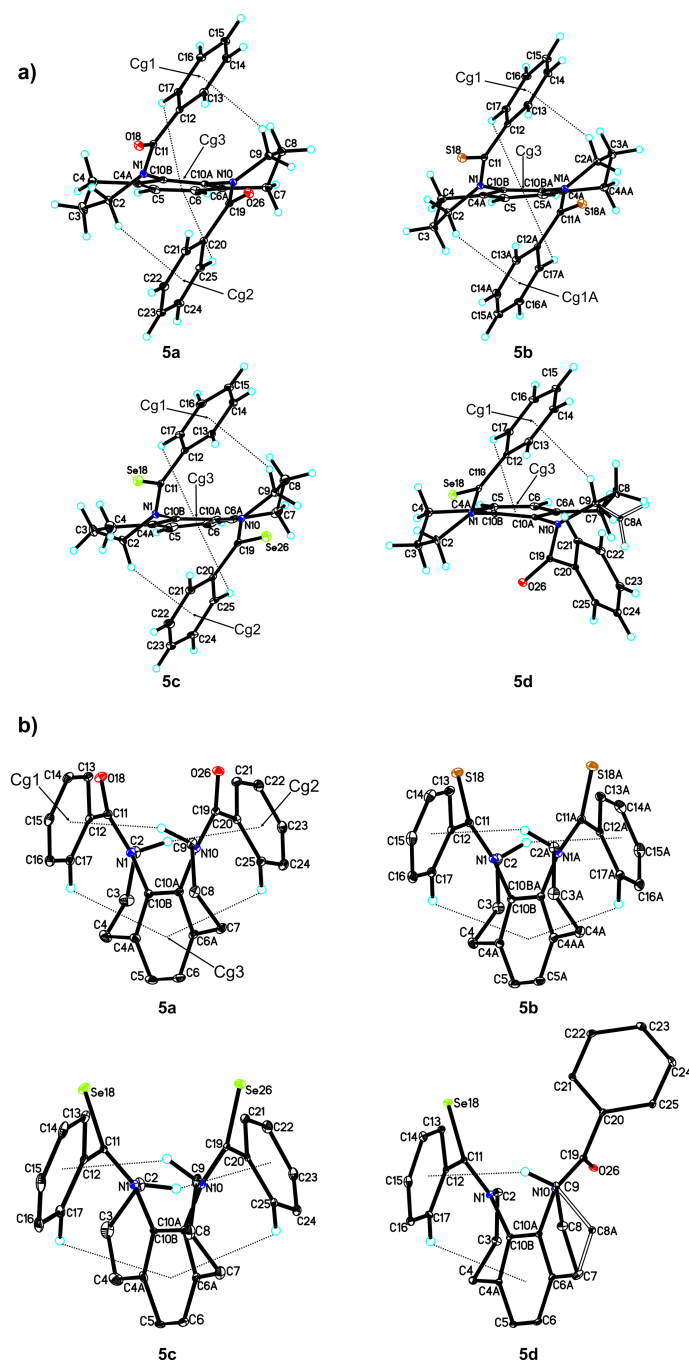

**Fig. 1S** Molecular structures of the compounds **5a-5d** showing the atom labeling scheme and 20% probability displacement ellipsoids viewed approximately parallel in the central phenantroline ring (a) and viewed approximately perpendicular to the central phenantroline ring (b). C–H... $\pi$  hydrogen bonds are represented by dotted lines (H atoms not involved in these interactions have been omitted). Cg1, Cg2 and Cg3 denote the ring centroids. The solvent molecule (CH<sub>2</sub>Cl<sub>2</sub>) for **5a** has been omitted.

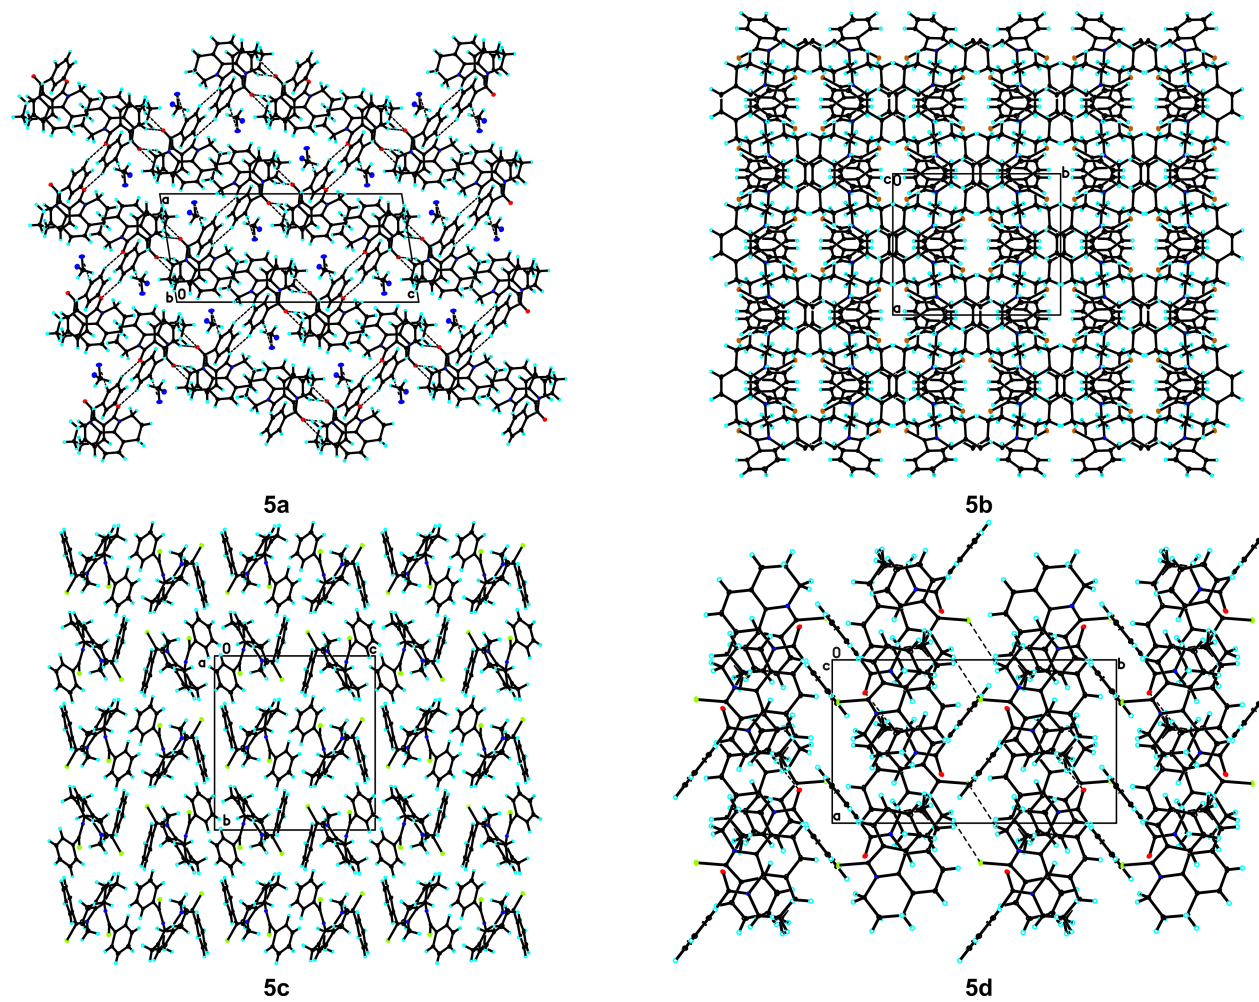

**Fig. 2S** Crystal packing of compounds **5a-5d**. C–H···X (where X = Se, S, O) hydrogen bonds are represented by dashed lines.

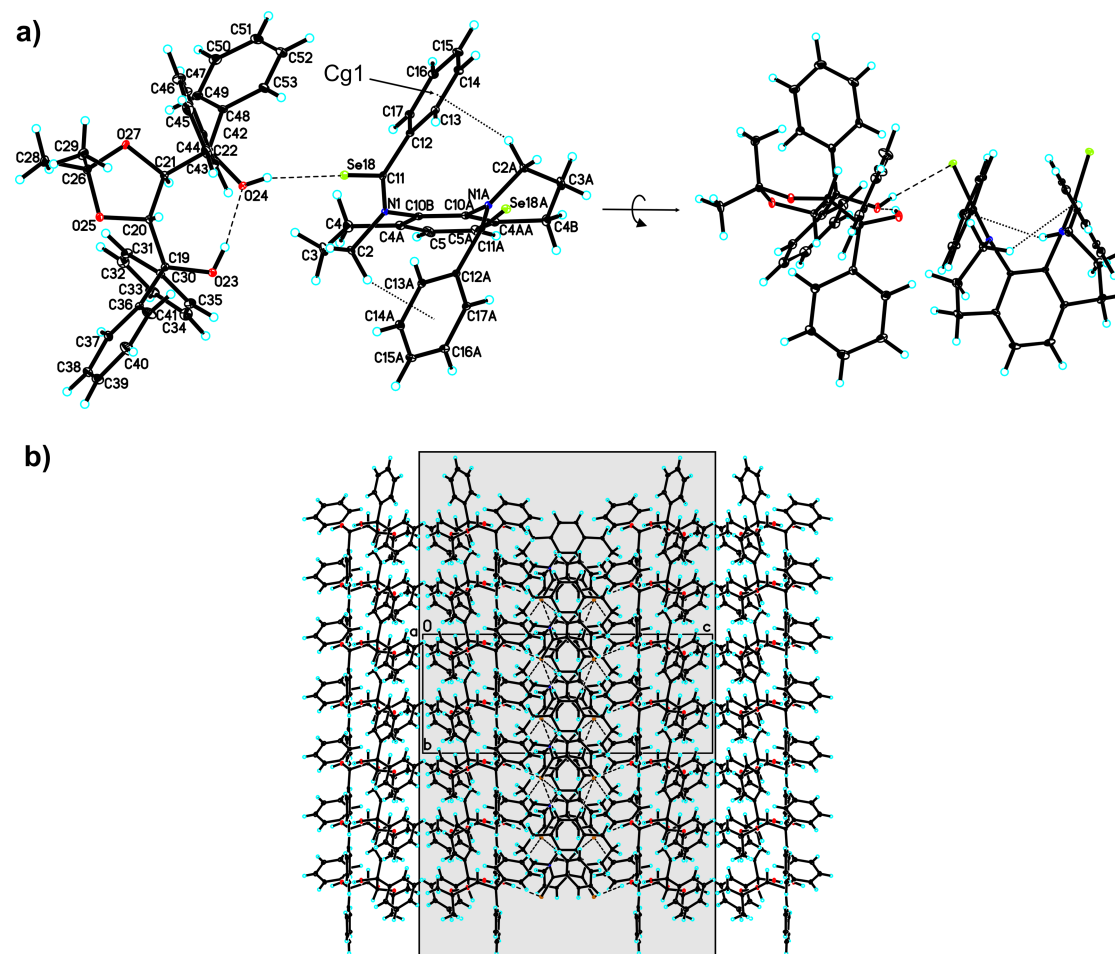

**Fig. 3S** Molecular structure showing the atom labeling scheme and 20% probability displacement ellipsoids (a) and crystal packing of the complex **5c·6a** (b) (the layers are highlighted in grey). O–H···Se, O–H···O and C–H···Se hydrogen bonds are represented by dashed lines. Cg1 denote the ring centroid.

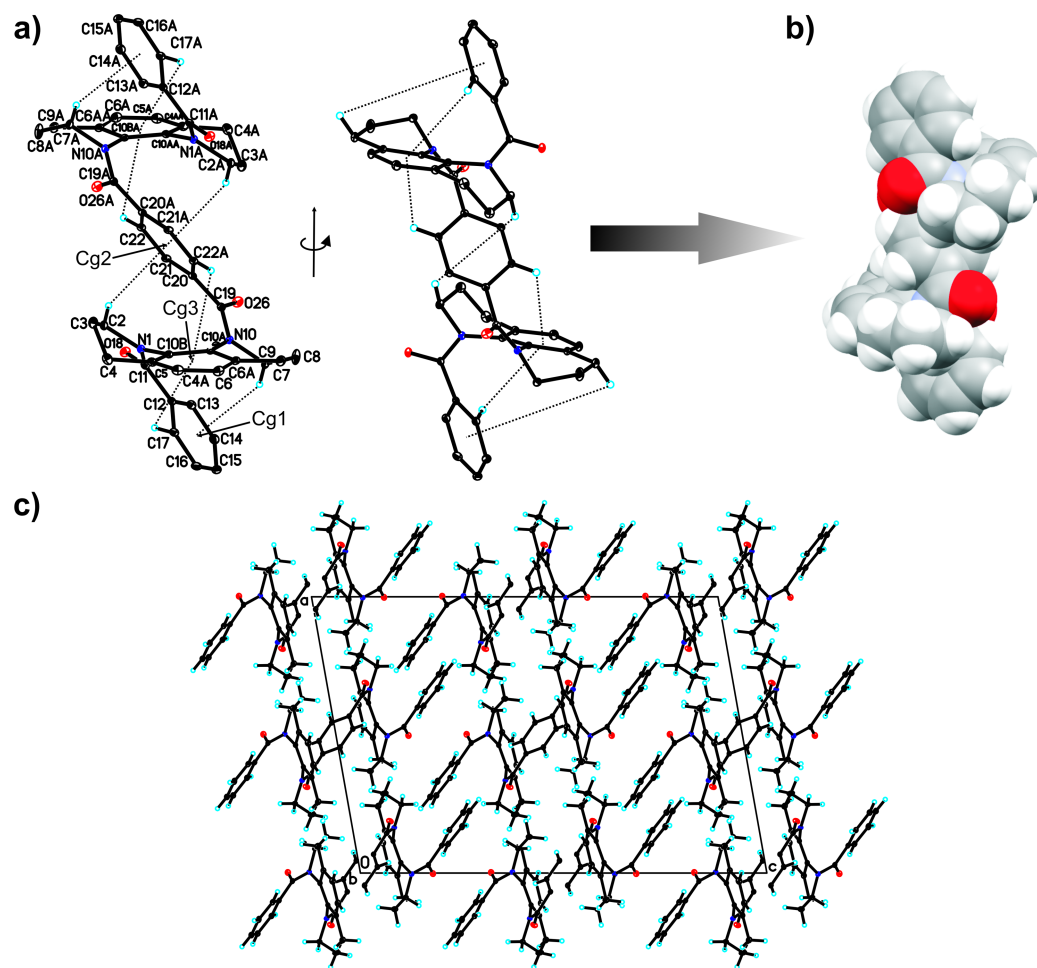

**Fig. 6S** Molecular structure of the bisamide **7** showing the atom labeling scheme and 20% probability displacement ellipsoids (a,) *meso*-helical structure of **7** (b) and crystal packing of bisamide **7** (c). The intramolecular C–H··· $\pi$  interactions are represented by dotted lines and (H atoms not involved in these interactions have been omitted, as well as solvent molecule (CHCl<sub>3</sub>)) and C–H···O hydrogen bonds are represented by dashed lines. Cg1, Cg2 and Cg3 denote the ring centroids.

**Table 1** DFT TZ2P LDA ZORA calculated structures, bonding energies and Cartesian coordinates of atoms of folded and partially unfolded compounds **5a–5c**.

| Folded                                                                            |             |             |             | Partially Unfolded                                                                 |             |             |             |
|-----------------------------------------------------------------------------------|-------------|-------------|-------------|------------------------------------------------------------------------------------|-------------|-------------|-------------|
| 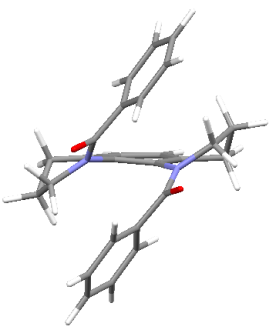 |             |             |             |  |             |             |             |
| <b>5a</b>                                                                         |             |             |             | <b>5a</b>                                                                          |             |             |             |
| 54 BE = -36541.59 kJ/mol                                                          |             |             |             | 54 BE = -36523.68 kJ/mol                                                           |             |             |             |
| C                                                                                 | -0.34070678 | -2.58474579 | -0.55791132 | C                                                                                  | -0.48489180 | -2.44273148 | -0.54916684 |
| C                                                                                 | 0.77069498  | -3.36074875 | -0.28677741 | C                                                                                  | 0.56932405  | -3.26938662 | -0.21053302 |
| C                                                                                 | 1.98644061  | -2.76439586 | -0.00600510 | C                                                                                  | 1.79919711  | -2.73022704 | 0.12352631  |
| C                                                                                 | 2.07988588  | -1.38928142 | 0.09918248  | C                                                                                  | 1.96207456  | -1.35911809 | 0.20314494  |
| C                                                                                 | 0.95045238  | -0.59274599 | -0.10475063 | C                                                                                  | 0.89824919  | -0.51475575 | -0.10617286 |
| C                                                                                 | -0.24787899 | -1.19104185 | -0.52291767 | C                                                                                  | -0.30617381 | -1.05864926 | -0.55159722 |
| N                                                                                 | 1.11484345  | 0.78448644  | 0.07207453  | N                                                                                  | 1.09461988  | 0.86624642  | 0.05731072  |
| N                                                                                 | -1.40343670 | -0.47624125 | -0.85431103 | N                                                                                  | -1.39606967 | -0.29628144 | -0.97535671 |
| C                                                                                 | 3.35304362  | -0.66753701 | 0.34605233  | C                                                                                  | 3.23952247  | -0.69689072 | 0.56691555  |
| C                                                                                 | 2.30890431  | 1.43149776  | -0.46523850 | C                                                                                  | 2.36296925  | 1.43417454  | -0.38859978 |
| C                                                                                 | -1.69167580 | -3.14524753 | -0.80977254 | C                                                                                  | -1.86574134 | -2.91150937 | -0.82803517 |
| C                                                                                 | -2.65638845 | -2.37975770 | 0.07512858  | C                                                                                  | -2.79498068 | -2.05511439 | 0.01561048  |
| C                                                                                 | -2.69112353 | -0.92668076 | -0.33182078 | C                                                                                  | -2.70201917 | -0.60406157 | -0.40667550 |
| H                                                                                 | 0.67806336  | -4.44967047 | -0.31719808 | H                                                                                  | 0.41994743  | -4.35251220 | -0.21533209 |
| H                                                                                 | 2.88065922  | -3.37181506 | 0.15731480  | H                                                                                  | 2.64449985  | -3.38034071 | 0.36439895  |
| C                                                                                 | 0.20930258  | 1.63703065  | 0.64968973  | C                                                                                  | 0.20462719  | 1.54963997  | 0.85294755  |
| C                                                                                 | -1.45502336 | 0.68669287  | -1.57937658 | C                                                                                  | -1.36144854 | 0.77117346  | -1.82393040 |
| H                                                                                 | 4.20565503  | -1.35929095 | 0.27629725  | H                                                                                  | 4.06329456  | -1.42595206 | 0.57905340  |
| H                                                                                 | 3.36495697  | -0.22783977 | 1.36156090  | H                                                                                  | 3.17074100  | -0.26072871 | 1.58155887  |
| H                                                                                 | 2.58440117  | 2.20925398  | 0.26490612  | H                                                                                  | 2.62517807  | 2.23714342  | 0.31599228  |
| H                                                                                 | 2.05148429  | 1.96185493  | -1.40012343 | H                                                                                  | 2.24045182  | 1.89273867  | -1.38793936 |
| H                                                                                 | -1.70316932 | -4.22543356 | -0.60127238 | H                                                                                  | -1.96532162 | -3.98181918 | -0.59421145 |
| H                                                                                 | -1.98380661 | -3.00851722 | -1.86837741 | H                                                                                  | -2.11864737 | -2.77928528 | -1.89697287 |
| H                                                                                 | -2.32039192 | -2.47354941 | 1.12230880  | H                                                                                  | -2.49814878 | -2.16479839 | 1.07157653  |
| H                                                                                 | -3.67715881 | -2.78825407 | 0.02200398  | H                                                                                  | -3.84138042 | -2.38671584 | -0.06655195 |
| H                                                                                 | -2.99360962 | -0.27739266 | 0.50980905  | H                                                                                  | -2.88289380 | 0.07881023  | 0.44015653  |
| H                                                                                 | -3.42223848 | -0.74904280 | -1.13676830 | H                                                                                  | -3.43480319 | -0.35405170 | -1.18899483 |
| C                                                                                 | 3.43354067  | 0.44718462  | -0.67916194 | C                                                                                  | 3.47436519  | 0.40380666  | -0.44462282 |
| H                                                                                 | 3.36255126  | 0.00169637  | -1.68656969 | H                                                                                  | 3.50710722  | -0.05119127 | -1.44919594 |
| H                                                                                 | 4.39217830  | 0.98563083  | -0.62761141 | H                                                                                  | 4.43681258  | 0.91342196  | -0.28507442 |
| O                                                                                 | 0.31199157  | 2.84527253  | 0.47729677  | O                                                                                  | -0.71099059 | 0.97896365  | 1.42862266  |
| O                                                                                 | -2.46447657 | 1.38001127  | -1.54966643 | O                                                                                  | -2.34704010 | 1.48643604  | -1.95968355 |
| C                                                                                 | -0.83073820 | 1.09763365  | 1.55185075  | C                                                                                  | 0.36946709  | 3.01732437  | 1.00702515  |
| C                                                                                 | -0.32679022 | 1.04981975  | -2.46282966 | C                                                                                  | -0.15120398 | 1.03434940  | -2.64298345 |
| C                                                                                 | -0.14190270 | 2.40222273  | -2.71954080 | C                                                                                  | 0.03939808  | 2.35397518  | -3.03506843 |
| C                                                                                 | 0.82793286  | 2.81381980  | -3.61293231 | C                                                                                  | 1.10535886  | 2.70079909  | -3.84311026 |
| C                                                                                 | 1.60664961  | 1.87523623  | -4.27222459 | C                                                                                  | 1.97508348  | 1.72144827  | -4.29800390 |
| C                                                                                 | 1.41324070  | 0.52468385  | -4.03284881 | C                                                                                  | 1.76571694  | 0.39871681  | -3.94606534 |
| C                                                                                 | 0.45161261  | 0.10982079  | -3.12861479 | C                                                                                  | 0.71041843  | 0.05284185  | -3.11914071 |
| C                                                                                 | -2.00911688 | 1.82516109  | 1.65665716  | C                                                                                  | 0.03022631  | 3.55329905  | 2.24347320  |
| C                                                                                 | -2.98499080 | 1.44192319  | 2.55610563  | C                                                                                  | 0.07731457  | 4.91798387  | 2.45077777  |
| C                                                                                 | -2.78132177 | 0.34063299  | 3.37301776  | C                                                                                  | 0.42854107  | 5.76607500  | 1.41240973  |
| C                                                                                 | -1.60087174 | -0.37844064 | 3.28341769  | C                                                                                  | 0.73381402  | 5.24151455  | 0.16872196  |
| C                                                                                 | -0.62724283 | -0.00534993 | 2.37352524  | C                                                                                  | 0.71602185  | 3.87303888  | -0.03121426 |
| H                                                                                 | -0.78314839 | 3.11545783  | -2.19620674 | H                                                                                  | -0.69566027 | 3.08888365  | -2.69511295 |
| H                                                                                 | 0.97337547  | 3.87912837  | -3.80489265 | H                                                                                  | 1.25013566  | 3.74266554  | -4.13858598 |
| H                                                                                 | 2.36332036  | 2.19904618  | -4.99109753 | H                                                                                  | 2.81003277  | 1.98849581  | -4.95029239 |
| H                                                                                 | 2.00729816  | -0.21816938 | -4.56965926 | H                                                                                  | 2.42702918  | -0.38114788 | -4.33021497 |
| H                                                                                 | 0.28963190  | -0.95866790 | -2.95207036 | H                                                                                  | 0.54871756  | -0.99683859 | -2.85328728 |
| H                                                                                 | -2.13205041 | 2.69752375  | 1.01042218  | H                                                                                  | -0.29049866 | 2.86379662  | 3.02863886  |
| H                                                                                 | -3.91235114 | 2.01420912  | 2.62928387  | H                                                                                  | -0.17579331 | 5.32976956  | 3.43013674  |
| H                                                                                 | -3.54499748 | 0.04829058  | 4.09788461  | H                                                                                  | 0.45259849  | 6.84698135  | 1.57120803  |
| H                                                                                 | -1.42761394 | -1.23216922 | 3.94226165  | H                                                                                  | 0.98550220  | 5.90698086  | -0.66054760 |
| H                                                                                 | 0.31166248  | -0.56576528 | 2.31435451  | H                                                                                  | 0.94370043  | 3.46590087  | -1.02067374 |



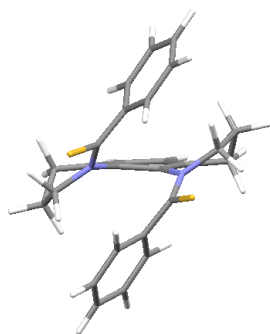

**5b**

54 BE=-35861.78 kJ/mol

|   |             |             |             |
|---|-------------|-------------|-------------|
| C | -0.38272702 | -2.54612162 | -0.51322588 |
| C | 0.72873013  | -3.32680029 | -0.26135311 |
| C | 1.95391049  | -2.73744237 | -0.02116202 |
| C | 2.06027410  | -1.36280911 | 0.06407132  |
| C | 0.93362815  | -0.55631162 | -0.12254208 |
| C | -0.28184063 | -1.15158969 | -0.50012148 |
| N | 1.11650694  | 0.82787090  | 0.04468910  |
| N | -1.44548739 | -0.43276013 | -0.82831065 |
| C | 3.35557932  | -0.66724325 | 0.26193024  |
| C | 2.32741310  | 1.43639350  | -0.50248182 |
| C | -1.73733157 | -3.11796859 | -0.71051344 |
| C | -2.66424971 | -2.32704574 | 0.18760665  |
| C | -2.72177475 | -0.90133157 | -0.29155341 |
| H | 0.62498343  | -4.41490040 | -0.27223574 |
| H | 2.84869629  | -3.34827963 | 0.12488560  |
| C | 0.24405988  | 1.65000499  | 0.68191797  |
| C | -1.47562986 | 0.67289023  | -1.61549668 |
| H | 4.18797062  | -1.38070736 | 0.17068877  |
| H | 3.41548174  | -0.21428154 | 1.27021179  |
| H | 2.64963664  | 2.17672789  | 0.25083038  |
| H | 2.06223642  | 2.01853839  | -1.40262971 |
| H | -1.73392314 | -4.19243092 | -0.47431594 |
| H | -2.06877905 | -3.00970701 | -1.76110208 |
| H | -2.28691077 | -2.37411915 | 1.22406257  |
| H | -3.68770515 | -2.73237057 | 0.19085699  |
| H | -3.05321126 | -0.20965604 | 0.50263438  |
| H | -3.44773029 | -0.78417422 | -1.11548295 |
| C | 3.41209128  | 0.42938397  | -0.77996924 |
| H | 3.27989006  | -0.01862883 | -1.78019687 |
| H | 4.37984270  | 0.95400820  | -0.77931781 |
| S | 0.36442007  | 3.29517091  | 0.55615483  |
| S | -2.81806848 | 1.63684327  | -1.69268400 |
| C | -0.74243420 | 1.06718611  | 1.59962153  |
| C | -0.34225310 | 0.94432157  | -2.50729083 |
| C | 0.00087448  | 2.26064996  | -2.80034291 |
| C | 0.99366318  | 2.53779992  | -3.71957556 |
| C | 1.64478369  | 1.50458815  | -4.37633940 |
| C | 1.29960361  | 0.19145016  | -4.10277504 |
| C | 0.31837525  | -0.08940004 | -3.16981263 |
| C | -1.98575246 | 1.67403125  | 1.74809115  |
| C | -2.88464468 | 1.20866706  | 2.68775034  |
| C | -2.54703682 | 0.14323619  | 3.50866777  |
| C | -1.30646536 | -0.45862985 | 3.37801048  |
| C | -0.41166885 | -0.00679721 | 2.42541762  |
| H | -0.53817523 | 3.05893007  | -2.28376665 |
| H | 1.25747235  | 3.57609792  | -3.93267934 |
| H | 2.41672412  | 1.72509458  | -5.11783736 |
| H | 1.78899968  | -0.62832865 | -4.63365665 |
| H | 0.03672161  | -1.12883394 | -2.97234123 |
| H | -2.22251452 | 2.52437789  | 1.10332427  |
| H | -3.85961987 | 1.69100610  | 2.78724316  |
| H | -3.25022612 | -0.21058480 | 4.26671563  |
| H | -1.02145905 | -1.28044423 | 4.03889836  |
| H | 0.57550120  | -0.47281560 | 2.34148653  |

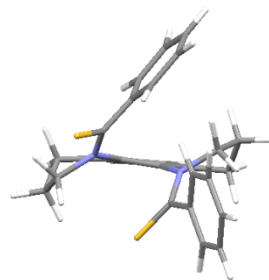

**5b**

54 BE=-35838.97 kJ/mol

|   |             |             |             |
|---|-------------|-------------|-------------|
| C | -0.34954925 | -2.43506600 | -0.58000701 |
| C | 0.72854300  | -3.20222852 | -0.17883732 |
| C | 1.91015342  | -2.60168834 | 0.21171228  |
| C | 1.99510597  | -1.22285302 | 0.29021262  |
| C | 0.90475330  | -0.44038557 | -0.07555567 |
| C | -0.24475897 | -1.04441099 | -0.58505243 |
| N | 1.02885040  | 0.95044784  | 0.11091191  |
| N | -1.34692724 | -0.32324708 | -1.06758629 |
| C | 3.21751459  | -0.48962340 | 0.70289768  |
| C | 2.27863763  | 1.56797970  | -0.34301695 |
| C | -1.69050521 | -2.98986380 | -0.89140994 |
| C | -2.67929066 | -2.15267470 | -0.10010915 |
| C | -2.67060706 | -0.73414185 | -0.60970432 |
| H | 0.63170562  | -4.29120502 | -0.17734054 |
| H | 2.77495131  | -3.20604858 | 0.49777100  |
| C | 0.18836266  | 1.58938041  | 0.96656056  |
| C | -1.27112604 | 0.74573710  | -1.89680648 |
| H | 4.07451321  | -1.17528125 | 0.77494591  |
| H | 3.07362039  | -0.03402137 | 1.70114174  |
| H | 2.47613062  | 2.41044606  | 0.33542988  |
| H | 2.14460651  | 1.98210928  | -1.35876829 |
| H | -1.73582916 | -4.05539048 | -0.62125307 |
| H | -1.92207392 | -2.91034678 | -1.97056583 |
| H | -2.38902732 | -2.17901213 | 0.96416197  |
| H | -3.70540526 | -2.54346732 | -0.17560659 |
| H | -3.01847480 | -0.01551123 | 0.15149665  |
| H | -3.33812373 | -0.61051937 | -1.48028017 |
| C | 3.44505145  | 0.59667889  | -0.32648151 |
| H | 3.55266813  | 0.12220719  | -1.31646060 |
| H | 4.36895683  | 1.16227186  | -0.13107962 |
| S | -0.95711132 | 0.81791805  | 1.87357067  |
| S | -2.56974570 | 1.74703295  | -2.11845630 |
| C | 0.30615454  | 3.05221102  | 1.05874834  |
| C | -0.05563970 | 0.94482273  | -2.70543607 |
| C | 0.25784308  | 2.22552423  | -3.15277783 |
| C | 1.35337856  | 2.44996423  | -3.96211399 |
| C | 2.14466090  | 1.38714960  | -4.37003050 |
| C | 1.81783007  | 0.10284044  | -3.97161982 |
| C | 0.73144218  | -0.11944204 | -3.14449194 |
| C | 0.24127509  | 3.67892472  | 2.29897949  |
| C | 0.28075327  | 5.05635903  | 3.38927693  |
| C | 0.35127997  | 5.82994901  | 1.24049962  |
| C | 0.39761062  | 5.21406971  | 0.00174419  |
| C | 0.38960092  | 3.83551981  | -0.08772157 |
| H | -0.42378313 | 3.03384693  | -2.87139597 |
| H | 1.58481910  | 3.46500287  | -4.29248316 |
| H | 3.00509951  | 1.55829897  | -5.02124062 |
| H | 2.41051031  | -0.74676964 | -4.31823229 |
| H | 0.47958731  | -1.14314948 | -2.85211196 |
| H | 0.13684628  | 3.05100943  | 3.18765082  |
| H | 0.24090483  | 5.53649083  | 3.36947079  |
| H | 0.36271362  | 6.92032261  | 1.31141430  |
| H | 0.43297877  | 5.81526498  | -0.90998005 |
| H | 0.42001269  | 3.34783712  | -1.06637527 |



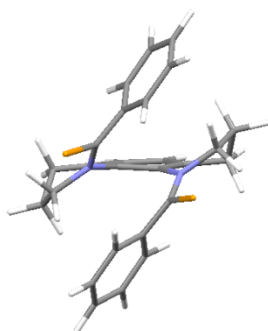

5c

54 BE=-35684.33 kJ/mol

|    |             |             |             |
|----|-------------|-------------|-------------|
| C  | -0.36305659 | -2.58061162 | -0.50497649 |
| C  | 0.75081677  | -3.35890015 | -0.25693717 |
| C  | 1.97537219  | -2.76709082 | -0.01991268 |
| C  | 2.08042106  | -1.39235562 | 0.06375652  |
| C  | 0.95172343  | -0.58746239 | -0.12052954 |
| C  | -0.26462971 | -1.18560165 | -0.49122790 |
| N  | 1.13363876  | 0.79989106  | 0.04438580  |
| N  | -1.43260393 | -0.46802476 | -0.81746219 |
| C  | 3.37804380  | -0.69799054 | 0.24990165  |
| C  | 2.34579044  | 1.40154771  | -0.50996285 |
| C  | -1.71648937 | -3.15777990 | -0.69416154 |
| C  | -2.63703548 | -2.36873929 | 0.21104604  |
| C  | -2.70313067 | -0.94556696 | -0.27309490 |
| H  | 0.64847981  | -4.44723298 | -0.26712223 |
| H  | 2.87224743  | -3.37572214 | 0.12238189  |
| C  | 0.26799409  | 1.61354230  | 0.68782787  |
| C  | -1.46075932 | 0.62530533  | -1.61077787 |
| H  | 4.20828074  | -1.41335591 | 0.15394013  |
| H  | 3.44811854  | -0.24036585 | 1.25529620  |
| H  | 2.67734330  | 2.13758118  | 0.24492399  |
| H  | 2.07540770  | 1.98951953  | -1.40476817 |
| H  | -1.70735819 | -4.23213094 | -0.45767911 |
| H  | -2.05597520 | -3.05105172 | -1.74226129 |
| H  | -2.25054598 | -2.41200410 | 1.24422112  |
| H  | -3.65974756 | -2.77563533 | 0.22388158  |
| H  | -3.03548358 | -0.25136724 | 0.51879459  |
| H  | -3.43346701 | -0.83542840 | -1.09536321 |
| C  | 3.42394449  | 0.39197270  | -0.79862253 |
| H  | 3.27817251  | -0.06049583 | -1.79485608 |
| H  | 4.39160428  | 0.91656187  | -0.81245540 |
| Se | 0.41448825  | 3.41091571  | 0.57522503  |
| Se | -2.93693185 | 1.66046327  | -1.72807429 |
| C  | -0.72562307 | 1.04722998  | 1.60019867  |
| C  | -0.33279643 | 0.91135600  | -2.49742153 |
| C  | 0.00497016  | 2.23010524  | -2.79153726 |
| C  | 1.00028513  | 2.51204127  | -3.70609588 |
| C  | 1.66156345  | 1.48301933  | -4.35903648 |
| C  | 1.32411756  | 0.16796014  | -4.08500888 |
| C  | 0.34154636  | -0.11844547 | -3.15518433 |
| C  | -1.96960856 | 1.65734606  | 1.74142429  |
| C  | -2.87879000 | 1.19033027  | 2.66989056  |
| C  | -2.55335119 | 0.12115948  | 3.49071124  |
| C  | -1.31220938 | -0.48185070 | 3.37149984  |
| C  | -0.40743063 | -0.03008184 | 2.42858214  |
| H  | -0.54059545 | 3.02649742  | -2.27835876 |
| H  | 1.25840862  | 3.55199281  | -3.91803911 |
| H  | 2.43508141  | 1.70797633  | -5.09738589 |
| H  | 1.82146192  | -0.64902437 | -4.61288182 |
| H  | 0.06524719  | -1.15979414 | -2.95920698 |
| H  | -2.20030056 | 2.50874025  | 1.09539393  |
| H  | -3.85414004 | 1.67378673  | 2.75945077  |
| H  | -3.26652131 | -0.23507492 | 4.23818289  |
| H  | -1.03600643 | -1.30773102 | 4.03114211  |
| H  | 0.57889246  | -0.49964709 | 2.35334314  |

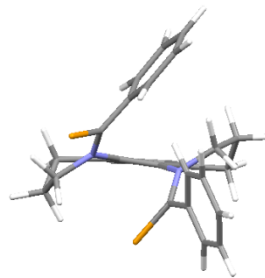

5c

54 BE=-35662.78 kJ/mol

|    |             |             |             |
|----|-------------|-------------|-------------|
| C  | -0.32939185 | -2.43776824 | -0.57691328 |
| C  | 0.74915768  | -3.20067421 | -0.16807017 |
| C  | 1.93137794  | -2.59717896 | 0.21547555  |
| C  | 2.01683002  | -1.21753394 | 0.28187939  |
| C  | 0.92413243  | -0.43991984 | -0.08484169 |
| C  | -0.22518786 | -1.04737996 | -0.59080066 |
| N  | 1.04771902  | 0.95252752  | 0.09637935  |
| N  | -1.32650591 | -0.32796332 | -1.08431386 |
| C  | 3.24067098  | -0.47776662 | 0.67828624  |
| C  | 2.29154598  | 1.57021267  | -0.37987092 |
| C  | -1.67064519 | -2.99686237 | -0.88008571 |
| C  | -2.65440869 | -2.14975866 | -0.09351715 |
| C  | -2.65066793 | -0.74143742 | -0.62683325 |
| H  | 0.65242072  | -4.28960837 | -0.15755488 |
| H  | 2.79667282  | -3.19926228 | 0.50487041  |
| C  | 0.23498362  | 1.59324497  | 0.96628645  |
| C  | -1.24144517 | 0.72845677  | -1.92067777 |
| H  | 4.09931794  | -1.16131744 | 0.75049602  |
| H  | 3.10317863  | -0.01249992 | 1.67297066  |
| H  | 2.49392763  | 2.41816912  | 0.29092200  |
| H  | 2.14316616  | 1.97668608  | -1.39658061 |
| H  | -1.71492733 | -4.05932393 | -0.59834255 |
| H  | -1.90653847 | -2.92868697 | -1.95902301 |
| H  | -2.35445356 | -2.15542413 | 0.96858541  |
| H  | -3.68121700 | -2.54098623 | -0.15462017 |
| H  | -3.00599650 | -0.01062861 | 0.11976720  |
| H  | -3.31438148 | -0.63643051 | -1.50381944 |
| C  | 3.45771001  | 0.59810656  | -0.36537381 |
| H  | 3.55502063  | 0.11308234  | -1.35139897 |
| H  | 4.38358832  | 1.16562275  | -0.18524545 |
| Se | -0.97430183 | 0.76478636  | 2.01474301  |
| Se | -2.66183266 | 1.81512596  | -2.17295395 |
| C  | 0.33391307  | 3.05330037  | 1.03952576  |
| C  | -0.03091402 | 0.93212855  | -2.72737641 |
| C  | 0.28386015  | 2.20795081  | -3.19181791 |
| C  | 1.38581254  | 2.42638961  | -3.99281058 |
| C  | 2.18948368  | 1.36393832  | -4.37580575 |
| C  | 1.86593783  | 0.08426701  | -3.96070556 |
| C  | 0.77149691  | -0.13234829 | -3.14292246 |
| C  | 0.35801834  | 3.70343451  | 2.26968542  |
| C  | 0.38659499  | 5.08247778  | 2.33063986  |
| C  | 0.35729960  | 5.83501791  | 1.16598522  |
| C  | 0.31641083  | 5.19632215  | -0.06150794 |
| C  | 0.32287194  | 3.81655315  | -0.12478260 |
| H  | -0.40376251 | 3.01912864  | -2.93297750 |
| H  | 1.61306599  | 3.43808893  | -4.33603245 |
| H  | 3.05650368  | 1.53164355  | -5.01899885 |
| H  | 2.46735080  | -0.76728922 | -4.28729524 |
| H  | 0.52275906  | -1.15433665 | -2.84176506 |
| H  | 0.33386505  | 3.09268599  | 3.17611322  |
| H  | 0.41805744  | 5.58081806  | 3.30209140  |
| H  | 0.35875166  | 6.92651340  | 1.21676015  |
| H  | 0.27117038  | 5.78021954  | -0.98425391 |
| H  | 0.28539386  | 3.30796814  | -1.09232204 |
